# Supplementary material
Source: publisher figshare collection journal article supplement (https://geolsoc.figshare.com/articles/dataset/_/3453845)
Supplement: Supplementary file 1 [file 1]

# Constituents of potential concern for human health risk assessment of petroleum fuel releases

Richard L. Bowers, GSI Environmental Inc., Austin, Texas, 78759 USA

Jonathan W.N. Smith, Shell Global Solutions, Lange Kleiweg 40, 2288 GK Rijswijk,  
The Netherlands

## Supplemental information File 1

*Table S1: Risk Equations*

*Table S2: Equations for Upper-End Hypothetical Source and Exposure Point Concentrations*

*Table S3: General Input Parameter Definitions and Values*

*Table S4: Chemical-Specific Physical and Chemical Properties*

*Table S5: Chemical-Specific Toxicological Parameters*

*Table S6: Fuel-Specific Parameters: Gasoline / Petrol*

*Table S7: Fuel-Specific Parameters: Diesel / Fuel oil*

*Table S8: Fuel-Specific Parameters: Kerosene / Jet fuel*

*References*

## Supplemental information File 2

*Table S9: Relative Upper-Bound Risk Due to Exposure to Fuel Constituents: Gasoline / Petrol*

*Table S10: Relative Upper-Bound Risk Due to Exposure to Fuel Constituents: Diesel / Fuel Oil*

*Table S11: Relative Upper-Bound Risk Due to Exposure to Fuel Constituents: Kerosene / Jet Fuel*

**Table S1: Risk Equations**

| INHALATION PATHWAYS                                                   |                                                                                                                                                                                                                                                                |      |
|-----------------------------------------------------------------------|----------------------------------------------------------------------------------------------------------------------------------------------------------------------------------------------------------------------------------------------------------------|------|
| Non-Cancer Hazard Quotient                                            | $HQ_{max} = C_{max}^{air} \cdot \frac{EF_{child} \cdot ED_{child}}{ATn_{child} \cdot \left(365 \frac{days}{year}\right) \cdot RfC_i}$                                                                                                                          | (1)  |
| Cancer Risk                                                           | $CR_{max} = C_{max}^{air} \cdot \frac{EF_{adult} \cdot ED_{adult} \cdot URF_i \cdot \left(1000 \frac{\mu g}{mg}\right)}{ATc \cdot \left(365 \frac{days}{year}\right)}$                                                                                         | (2)  |
| WATER INGESTION PATHWAY                                               |                                                                                                                                                                                                                                                                |      |
| Non-Cancer Hazard Quotient                                            | $HQ_{max} = C_{max}^{water} \cdot \frac{EF_{child} \cdot ED_{child} \cdot IR_{child}^{water}}{BW_{child} \cdot ATn_{child} \cdot \left(365 \frac{days}{year}\right) \cdot RfD_o}$                                                                              | (3)  |
| Cancer Risk                                                           | $CR_{max} = C_{max}^{water} \cdot \frac{EF_{adult} \cdot ED_{adult} \cdot IR_{adult}^{water} \cdot SF_o}{BW_{adult} \cdot ATc \cdot \left(365 \frac{days}{year}\right)}$                                                                                       | (4)  |
| SOIL INGESTION PATHWAY                                                |                                                                                                                                                                                                                                                                |      |
| Non-Cancer Hazard Quotient                                            | $HQ_{max} = C_{max}^{soil} \cdot \frac{EF_{child} \cdot ED_{child} \cdot IR_{child}^{soil} \cdot \left(\frac{10^{-6} kg}{mg}\right)}{BW_{child} \cdot ATn_{child} \cdot \left(365 \frac{days}{year}\right) \cdot RfD_o}$                                       | (5)  |
| Cancer Risk                                                           | $CR_{max} = C_{max}^{soil} \cdot \frac{EF_{adult} \cdot ED_{adult} \cdot IR_{adult}^{soil} \cdot \left(\frac{10^{-6} kg}{mg}\right) \cdot SF_o}{BW_{adult} \cdot ATc \cdot \left(365 \frac{days}{year}\right)}$                                                | (6)  |
| SOIL DERMAL CONTACT PATHWAY                                           |                                                                                                                                                                                                                                                                |      |
| Non-Cancer Hazard Quotient                                            | $HQ_{max} = C_{max}^{soil} \cdot \frac{EF_{child} \cdot ED_{child} \cdot SA_{child} \cdot M_{child} \cdot \frac{ABS_d}{ABS_{GI}} \cdot \left(\frac{10^{-6} kg}{mg}\right)}{BW_{child} \cdot ATn_{child} \cdot \left(365 \frac{days}{year}\right) \cdot RfD_o}$ | (7)  |
| Cancer Risk                                                           | $CR_{max} = C_{max}^{soil} \cdot \frac{EF_{adult} \cdot ED_{adult} \cdot SA_{adult} \cdot M_{adult} \cdot \frac{ABS_d}{ABS_{GI}} \cdot \left(\frac{10^{-6} kg}{mg}\right) \cdot SF_o}{BW_{child} \cdot ATc \cdot \left(365 \frac{days}{year}\right)}$          | (8)  |
| COMBINED SOIL DIRECT CONTACT (Inhalation + Ingestion +Dermal Contact) |                                                                                                                                                                                                                                                                |      |
| Non-Cancer Hazard Quotient                                            | $[HQ_{max}]_{tot} = [HQ_{max}]_{inhal} + [HQ_{max}]_{ingest} + [HQ_{max}]_{dermal}$                                                                                                                                                                            | (9)  |
| Cancer Risk                                                           | $[CR_{max}]_{tot} = [CR_{max}]_{inhal} + [CR_{max}]_{ingest} + [CR_{max}]_{dermal}$                                                                                                                                                                            | (10) |

**Table S2: Equations for Upper-End Hypothetical Source and Exposure Point Concentrations**

| NONAQUEOUS PHASE LIQUIDS                                                                                            |                                               |                                                                                                                                                                              |                                                                                                                                                                                                                                                                                                         |
|---------------------------------------------------------------------------------------------------------------------|-----------------------------------------------|------------------------------------------------------------------------------------------------------------------------------------------------------------------------------|---------------------------------------------------------------------------------------------------------------------------------------------------------------------------------------------------------------------------------------------------------------------------------------------------------|
| Max Source Concentration                                                                                            | Exposure Pathway                              | Exposure Concentration                                                                                                                                                       | Natural Attenuation Factor                                                                                                                                                                                                                                                                              |
| $C_{max}^{soil\ gas} = X \cdot P_{vap} = H \cdot S_{eff} \cdot \left(\frac{1000\ L}{m^3}\right)$ (11)               | Indoor Inhalation of Vapors                   | $C_{air}^{max} = C_{max}^{soil\ gas} \cdot DF_{esp}$ (12)                                                                                                                    | $DF_{esp} = \frac{Q_s}{ER \cdot V_{esp}}$ (13)                                                                                                                                                                                                                                                          |
| AFFECTED SOILS                                                                                                      |                                               |                                                                                                                                                                              |                                                                                                                                                                                                                                                                                                         |
| Max Source Concentration                                                                                            | Exposure Pathway                              | Exposure Concentration                                                                                                                                                       | Natural Attenuation Factor (ASTM, 2010)                                                                                                                                                                                                                                                                 |
| $C_{max}^{soil} = MF \cdot \frac{\rho_{fuel}}{\rho_s} \cdot \theta_{as} \cdot \left(10^6 \frac{mg}{kg}\right)$ (14) | Outdoor Inhalation of Vapors and Particulates | $C_{max}^{air} = C_{max}^{soil} \cdot PEF + \min \left\{ \begin{matrix} C_{max}^{soil} \cdot VF_{ss}^{mb} \\ C_{sat}^{soil} \cdot VF_{ss}^{flux} \end{matrix} \right\}$ (16) | $VF_{ss}^{flux} = \frac{2 \cdot W \cdot \rho_s}{U_{air} \delta_{air}} \cdot \sqrt{\frac{D_s^{eff} \cdot H}{\pi \tau \cdot (\theta_{ws} + k_s \rho_s + H \theta_{as})}} \times 10^3$ (20)                                                                                                                |
| $C_{sat}^{soil} = S_{eff} \cdot \frac{\theta_{ws} + k_s \cdot \rho_s + H \cdot \theta_{as}}{\rho_s}$ (15)           |                                               |                                                                                                                                                                              | $VF_{ss}^{mb} = \frac{W \cdot \rho_s \cdot d_s}{U_{air} \cdot \delta_{air} \cdot \tau}$ (21)                                                                                                                                                                                                            |
|                                                                                                                     | Indoor Inhalation of Vapors and Particulates  | $C_{max}^{air} = \min \left\{ \begin{matrix} C_{max}^{soil} \cdot VF_{sesp}^{mb} \\ C_{sat}^{soil} \cdot VF_{sesp}^{flux} \end{matrix} \right\}$ (17)                        | $VF_{sesp}^{flux} = \frac{H \cdot \rho_s}{(\theta_{ws} + k_s \rho_s + H \theta_{as})} \cdot \left[ \frac{D_s^{eff} / L_s}{ER \cdot L_B} \right] \cdot e^\xi$<br>$e^\xi + \left[ \frac{D_s^{eff} / L_s}{ER \cdot L_B} \right] + \left[ \frac{D_s^{eff} / L_s}{Q_s / A_b} \right] \cdot [e^\xi - 1]$ (22) |
|                                                                                                                     | Dermal Contact                                | $C_{max}^{soil}$ (18)                                                                                                                                                        | N/A                                                                                                                                                                                                                                                                                                     |
|                                                                                                                     | Ingestion                                     | $C_{max}^{soil}$ (19)                                                                                                                                                        | N/A                                                                                                                                                                                                                                                                                                     |
| AFFECTED GROUNDWATER                                                                                                |                                               |                                                                                                                                                                              |                                                                                                                                                                                                                                                                                                         |
| Max Source Concentration                                                                                            | Exposure Pathway                              | Exposure Concentration                                                                                                                                                       | Natural Attenuation Factor (ASTM, 2010)                                                                                                                                                                                                                                                                 |
| $C_{max}^{gw} = S_{eff} = X \cdot S_{aq}$ (24)                                                                      | Outdoor Inhalation of Vapors and Particulates | $C_{max}^{air} = C_{max}^{gw} \cdot VF_{wamb}^{flux}$ (25)                                                                                                                   | $VF_{wamb}^{flux} = \frac{H}{1 + \left[ \frac{U_{air} \cdot \delta_{air} \cdot L_{GW}}{D_{ws}^{eff} \cdot W} \right]} \times 10^3$ (28)                                                                                                                                                                 |
|                                                                                                                     | Indoor Inhalation of Vapors and Particulates  | $C_{max}^{air} = C_{max}^{gw} \cdot VF_{wesp}^{flux}$ (26)                                                                                                                   | $VF_{wesp}^{flux} = \frac{H \cdot \left[ \frac{D_{ws}^{eff} / L_{GW}}{ER \cdot L_B} \right] \cdot e^\xi}{e^\xi + \left[ \frac{D_{ws}^{eff} / L_{GW}}{ER \cdot L_B} \right] + \left[ \frac{D_{ws}^{eff} / L_s}{Q_s / A_b} \right] \cdot [e^\xi - 1]} \times 10^3$ (29)                                   |
|                                                                                                                     | Ingestion                                     | $C_{max}^{gw} = S_{eff}$ (27)                                                                                                                                                | N/A                                                                                                                                                                                                                                                                                                     |

**Table 2 (continued): Equations for Upper-End Hypothetical Source and Exposure Point Concentrations**

| SUPPLEMENTAL CALCULATIONS        |                                                                                                                                                                              |                                                               |
|----------------------------------|------------------------------------------------------------------------------------------------------------------------------------------------------------------------------|---------------------------------------------------------------|
| Soil-Water Partition Factor      | Effective Diffusivity Coefficients (ASTM, 2010)                                                                                                                              | Connective Air Flow Through Foundation (ASTM, 2010)           |
| $k_s = f_{oc} \cdot K_{oc}$ (30) | $D_s^{eff} = D_{air} \cdot \frac{\theta_{as}^{3.33}}{\theta_f^2} + \left[ \frac{D_{wat}}{H} \right] \cdot \left[ \frac{\theta_{ws}^{3.33}}{\theta_f^2} \right]$ (31)         | $\xi = \frac{Q_s/A_b}{(D_s^{eff}/L_{crack}) \cdot \eta}$ (34) |
|                                  | $D_{ws}^{eff} = (h_c + h_v) \cdot \left[ \frac{h_c}{D_{cap}^{eff}} + \frac{h_v}{D_s^{eff}} \right]$ (32)                                                                     |                                                               |
|                                  | $D_{cap}^{eff} = D_{air} \cdot \frac{\theta_{acap}^{3.33}}{\theta_f^2} + \left[ \frac{D_{wat}}{H} \right] \cdot \left[ \frac{\theta_{wcap}^{3.33}}{\theta_f^2} \right]$ (33) |                                                               |

Note: See Table 3 for parameter definitions and default input values.

**Table S3: General Input Parameter Definitions and Values**

| Variable                   | Definition                               | Units                 | Default Value (Residential) | Reference                        |
|----------------------------|------------------------------------------|-----------------------|-----------------------------|----------------------------------|
| <b>Exposure Factors</b>    |                                          |                       |                             |                                  |
| ABS <sub>d</sub>           | Dermal absorption factor                 | unitless              | CS                          | Table 5                          |
| ABS <sub>G</sub>           | Gastrointestinal absorption factor       | unitless              | CS                          |                                  |
| AT <sub>c</sub>            | Averaging time - carcinogens             | yr                    | 70                          | ASTM 2010, USEPA 1997a           |
| AT <sub>n</sub>            | Averaging time - non-carcinogens (Adult) | yr                    | 30                          | ASTM 2010, USEPA 1997a           |
|                            | Averaging time - non-carcinogens (Child) |                       | 6                           | USEPA 1997a                      |
| BW                         | Body weight (Adult)                      | kg                    | 70                          | ASTM 2010, USEPA 1997a           |
|                            | Body weight (Child)                      |                       | 15                          | USEPA 1997a                      |
| ED                         | Exposure duration (Adult)                | yr                    | 30                          | ASTM 2010, USEPA 1997a           |
|                            | Exposure duration (Child)                |                       | 6                           | USEPA 1997a                      |
| EF                         | Exposure frequency (Adult)               | d/yr                  | 350                         | ASTM 2010, USEPA 1997a           |
|                            | Exposure frequency (Child)               |                       | 350                         | USEPA 1997a                      |
| IR <sup>soil</sup>         | Soil ingestion rate (Adult)              | mg/d                  | 200                         | ASTM 2010, USEPA 1997a           |
|                            | Soil ingestion rate (Child)              |                       | 100                         | USEPA 1997a                      |
| IR <sup>water</sup>        | Water Ingestion rate (Adult)             | L/d                   | 2                           | ASTM 2010, USEPA 1997a, WHO 2011 |
|                            | Water ingestion rate (Child)             |                       | 1                           |                                  |
| M                          | Soil to skin adherence factor (Adult)    | mg/cm <sup>2</sup> /d | 0.5                         | ASTM 2010                        |
| SA                         | Exposed skin surface area (Adult)        | cm <sup>2</sup>       | 6840                        | USEPA 1997a                      |
|                            | Exposed skin surface area (Child)        |                       | 2520                        |                                  |
| <b>Physical Parameters</b> |                                          |                       |                             |                                  |
| <b>Fuel Properties</b>     |                                          |                       |                             |                                  |
| ρ <sub>fuel</sub>          | Fuel liquid density                      | kg/L                  | FS                          | Tables 6, 7, 8                   |
| MF                         | Constituent mass fraction in fuel        | unitless              | CS / FS                     |                                  |

**Table S3 (continued): General Input Parameter Definitions and Values**

| Variable                         | Definition                                                                         | Units                | Default Value (Residential)        |                          | Reference              |
|----------------------------------|------------------------------------------------------------------------------------|----------------------|------------------------------------|--------------------------|------------------------|
| <b>Soil Properties</b>           |                                                                                    |                      |                                    |                          |                        |
| $\rho_s$                         | Soil bulk density                                                                  | kg/L                 | 1.7                                |                          | ASTM 2010              |
| $\theta_{as}$                    | Air-filled soil porosity                                                           | unitless             | 0.26                               |                          |                        |
| $\theta_{acap}$                  | Total air-filled porosity in capillary fringe                                      | unitless             | $\theta_T + \theta_{wcap} = 0.038$ |                          |                        |
| $\theta_T$                       | Total soil porosity                                                                | unitless             | $\theta_{as} + \theta_{ws} = 0.38$ |                          |                        |
| $\theta_{ws}$                    | Water-filled soil porosity                                                         | unitless             | 0.12                               |                          |                        |
| $\theta_{wcap}$                  | Total water-filled porosity in capillary fringe                                    | unitless             | 0.342                              |                          |                        |
| $f_{oc}$                         | Fraction organic carbon in soil                                                    | mg-carbon/mg-soil    | 0.01                               |                          |                        |
| <b>Surface/Source Properties</b> |                                                                                    |                      |                                    |                          |                        |
| $\delta_{air}$                   | Ambient air mixing zone height                                                     | cm                   | 200                                |                          | ASTM 2010              |
| $\tau$                           | Averaging time for surface vapor emission flux (30 yr)                             | sec                  | 9.5E+8                             |                          | ASTM 2010              |
| $h_c$                            | Vadose zone thickness                                                              | cm                   | 295                                |                          | ASTM 2010              |
| $h_c$                            | Capillary fringe thickness                                                         | cm                   | 5                                  |                          | ASTM 2010              |
| $L_{GW}$                         | Depth to affected groundwater ( $=h_c+h_v$ )                                       | cm                   | 3                                  |                          | ASTM 2010              |
| $L_s$                            | Depth to affected subsurface soil source                                           | cm                   | 15                                 |                          | ASTM 2010, USEPA 2004a |
| $U_{air}$                        | Ambient air velocity in mixing zone                                                | cm/s                 | 225                                |                          | ASTM 2010              |
| $W$                              | Source width parallel to wind or groundwater flow direction                        | cm                   | 4500                               |                          | ASTM 2010              |
| <b>Building / Enclosed Space</b> |                                                                                    |                      |                                    |                          |                        |
| $A_b$                            | Slab area                                                                          | cm <sup>2</sup>      | 700000                             |                          | ASTM 2010              |
| $\eta$                           | Foundation crack fraction                                                          | unitless             | Diffusion Driven: 0.01             | Convection Driven: 0.001 | ASTM 2010, USEPA 2004a |
| ER                               | Enclosed-space air exchange rate (12 air exchanges per day)                        | 1/s                  | 2.8E-4                             |                          | ASTM 2010, USEPA 2004a |
| $L_B$                            | Enclosed space volume/infiltration area ratio                                      | cm                   | 200                                |                          | ASTM 2010, USEPA 2004a |
| $L_{crack}$                      | Enclosed space foundation perimeter                                                | cm                   | 3400                               |                          | ASTM 2010              |
| $Q_s$                            | Convective airflow through basement foundation (5 L/min = 83 cm <sup>3</sup> /sec) | cm <sup>3</sup> /sec | Diffusion Driven: 0                | Convection Driven: 83    | ASTM 2010, USEPA 2004a |
| $V_{esp}$                        | Volume of enclosed space                                                           | cm <sup>3</sup>      | 1.4E+8                             |                          | USEPA 2004b            |

**Table S3 (continued): General Input Parameter Definitions and Values**

| Variable                                                               | Definition                                                                                                    | Units                                 | Default Value (Residential) | Reference                 |
|------------------------------------------------------------------------|---------------------------------------------------------------------------------------------------------------|---------------------------------------|-----------------------------|---------------------------|
| <b>Chemical Parameters</b>                                             |                                                                                                               |                                       |                             |                           |
| $C_{\max, \text{soilgas}}$                                             | Soil gas saturation concentration, in equilibrium with saturated pore water (vapor inhalation pathways)       | mg/kg                                 | CS / FS : calc              | Eqn. 11                   |
| $C_{\max, \text{soil}}$                                                | Max. soil saturation for direct contact pathways. Soil pores saturated with fuel.                             | mg/kg                                 | CS / FS : calc              | Eqn. 14, Tables 6, 7, 8   |
| $C_{\text{sat}, \text{soil}}$                                          | Soil saturation conc. at equilibrium with effective solubility and vapor pressure (vapor inhalation pathways) | mg/kg                                 | CS / FS : calc              | Eqn. 15, Tables 6, 7, 8   |
| $D_{\text{air}}$                                                       | Diffusion coefficient in air                                                                                  | cm <sup>2</sup> /sec                  | CS                          | Table 4                   |
| $D_{\text{wat}}$                                                       | Diffusion coefficient in water                                                                                | cm <sup>2</sup> /sec                  | CS                          |                           |
| H                                                                      | Henry's Law coefficient                                                                                       | unitless                              | CS                          |                           |
| $k_s$                                                                  | Soil-water partitioning coefficient                                                                           | cm <sup>3</sup> -water/g - soil       | calc                        | Eqn. 30                   |
| $K_{\text{oc}}$                                                        | Water-organic carbon partitioning coefficient                                                                 | cm <sup>3</sup> -water/g - soil       | CS                          | Table 4                   |
| $\text{Rf}C_i$                                                         | Inhalation reference concentration (threshold/non-cancer)                                                     | mg/m <sup>3</sup>                     | CS                          |                           |
| $\text{Rf}D_o$                                                         | Oral reference dose (or tolerable daily intake; threshold/non-cancer)                                         | mg/kg/d                               | CS                          |                           |
| $S_{\text{aq}}$                                                        | Aqueous solubility (pure form)                                                                                | mg/L                                  | CS                          |                           |
| $S_{\text{eff}}$                                                       | Effective solubility = $X \cdot S_{\text{aq}}$                                                                | unitless                              | CS / FS : calc              |                           |
| $\text{SF}_o$                                                          | Oral slope factor (non-threshold/cancer)                                                                      | (mg/kg/d) <sup>-1</sup>               | CS                          | Table 4                   |
| $\text{URF}_i$                                                         | Inhalation unit risk factor (non-threshold/cancer)                                                            | (ug/m <sup>3</sup> ) <sup>-1</sup>    | CS                          |                           |
| X                                                                      | Constituent mole fraction in fuel                                                                             | unitless                              | CS / FS                     | Tables 6, 7, 8            |
| <b>Natural Attenuation Factors</b>                                     |                                                                                                               |                                       |                             |                           |
| PEF                                                                    | Particulate emission factor                                                                                   | (mg/m <sup>3</sup> -air)/(mg/kg-soil) | 6.9E-12                     | ASTM 2010                 |
| $\text{VF}_{\text{seps}}$                                              | Subsurface soil to enclosed space volatilization factor                                                       | (mg/m <sup>3</sup> -air)/(mg/kg-soil) | CS : calc                   | Eqn. 22 and 23; ASTM 2010 |
| $\text{VF}_{\text{ss}}$                                                | Surface soil to ambient air volatilization factor                                                             | (mg/m <sup>3</sup> -air)/(mg/kg-soil) | CS : calc                   | Eqn. 20 and 21; ASTM 2010 |
| $\text{VF}_{\text{wamb}}$                                              | Groundwater to ambient air volatilization factor                                                              | (mg/m <sup>3</sup> -air)/(mg/L-water) | CS : calc                   | Eqn. 28; ASTM 2010        |
| $\text{VF}_{\text{wesp}}$                                              | Groundwater to enclosed space volatilization factor                                                           | (mg/m <sup>3</sup> -air)/(mg/L-water) | CS : calc                   | Eqn. 29; ASTM 2010        |
| Notes: CS = chemical specific; SS = site specific; FS = fuel specific. |                                                                                                               |                                       |                             |                           |

**Table S4: Chemical-Specific Physical and Chemical Properties**

| Compound                       | H                    | log(K <sub>oc</sub> )               | S <sub>aq</sub>    | D <sub>air</sub>     | D <sub>wat</sub>     |
|--------------------------------|----------------------|-------------------------------------|--------------------|----------------------|----------------------|
|                                | Henry's Law Constant | Organic Water Partition Coefficient | Aqueous Solubility | Diffusion in Air     | Diffusion in Water   |
|                                | (-)                  | (-)                                 | (mg/l)             | (cm <sup>2</sup> /s) | (cm <sup>2</sup> /s) |
| <b>Individual Constituents</b> |                      |                                     |                    |                      |                      |
| Acenaphthene                   | 6.4E-3               | 3.9E+0                              | 4.2E+0             | 4.2E-2               | 7.7E-6               |
| Acenaphthylene                 | 4.7E-3               | 3.6E+0                              | 3.9E+0             | 4.4E-2               | 7.5E-6               |
| Anthracene                     | 2.7E-3               | 4.5E+0                              | 4.3E-2             | 3.2E-2               | 7.7E-6               |
| Benz-a-anthracene              | 1.4E-4               | 5.6E+0                              | 9.4E-3             | 5.1E-2               | 9.0E-6               |
| Benzene                        | 2.3E-1               | 1.8E+0                              | 1.8E+3             | 8.8E-2               | 9.8E-6               |
| Benzo-a-pyrene                 | 4.6E-5               | 6.0E+0                              | 1.6E-3             | 4.3E-2               | 9.0E+0               |
| Benzo-b-fluoranthene           | 4.6E-3               | 6.1E+0                              | 1.5E-3             | 2.3E-2               | 5.6E-6               |
| Benzo-e-pyrene                 | 2.4E-5               | 6.6E+0                              | 8.6E-4             | 4.1E-2               | 5.5E-6               |
| Benzo-g,h,i-perylene           | 1.1E-5               | 5.0E+0                              | 2.6E-4             | 4.9E-2               | 5.7E-6               |
| Biphenyl, 1,1-                 | 1.2E-2               | 3.7E+0                              | 7.5E+0             | 5.7E-2               | 6.7E-6               |
| Chrysene                       | 3.9E-3               | 5.6E+0                              | 1.6E-3             | 2.5E-2               | 6.2E-6               |
| Cumene                         | 6.1E-1               | 3.5E+0                              | 5.0E+1             | 6.5E-2               | 7.1E-6               |
| Cyclohexane                    | 6.7E+0               | 2.9E+0                              | 4.2E+1             | 7.8E-2               | 8.4E-6               |
| Dibromoethane, 1,2- (EDB)      | 2.7E-2               | 2.4E+0                              | 3.9E+3             | 7.3E-2               | 8.3E-6               |
| Dichloroethane, 1,2- (EDC)     | 4.8E-2               | 2.2E+0                              | 8.6E+3             | 2.9E-2               | 8.1E-6               |
| Diisopropyl ether (DIPE)       | 1.6E-1               | 1.8E+0                              | 2.7E+3             | 1.0E-1               | 9.9E-6               |
| Ethyl benzene                  | 3.2E-1               | 2.6E+0                              | 1.7E+2             | 5.4E-2               | 6.8E-6               |
| Ethyl tert-butyl ether (ETBE)  | 2.4E-2               | 2.4E+0                              | 1.2E+4             | 7.5E-2               | 7.8E-6               |
| Fluoranthene                   | 6.6E-4               | 5.0E+0                              | 2.1E-1             | 3.0E-2               | 6.4E-6               |
| Fluorene                       | 2.6E-3               | 4.1E+0                              | 2.0E+0             | 3.6E-2               | 7.9E-6               |
| Heptane, n-                    | 8.4E+1               | 3.8E+0                              | 2.7E+0             | 6.5E-2               | 7.0E-6               |
| Hexane, n-                     | 4.7E+1               | 2.7E+0                              | 1.3E+1             | 2.0E-1               | 7.8E-6               |
| Indeno-1,2,3-cd-pyrene         | 6.6E-5               | 6.5E+0                              | 2.2E-5             | 1.9E-2               | 5.7E-6               |
| Methyl cyclohexane             | 1.6E+1               | 3.3E+0                              | 1.0E+1             | 7.0E-2               | 7.6E-6               |
| Methyl naphthalene, 1-         | 1.6E-2               | 3.4E+0                              | 2.8E+1             | 6.3E-2               | 7.1E-6               |
| Methyl naphthalene, 2-         | 1.8E-2               | 3.6E+0                              | 2.5E+1             | 6.3E-2               | 7.2E-6               |
| Methyl tert-butyl ether (MTBE) | 2.4E-2               | 1.9E+0                              | 5.1E+4             | 7.9E-2               | 9.4E-6               |
| Naphthalene                    | 2.0E-2               | 3.3E+0                              | 3.1E+1             | 5.9E-2               | 7.5E-6               |
| Phenanthrene                   | 1.7E-3               | 3.9E+0                              | 8.3E-1             | 5.8E-2               | 6.7E-6               |
| Pyrene                         | 4.5E-4               | 5.0E+0                              | 1.4E-1             | 2.7E-2               | 7.2E-6               |
| Tert-amyl-methyl ether (TAME)  | 5.4E-2               | 2.4E+0                              | 2.6E+3             | 7.3E-2               | 8.5E-6               |
| Tert-butyl alcohol (TBA)       | 3.7E-4               | 1.6E+0                              | 1.0E+6             | 8.8E-2               | 1.0E-5               |

**Table S4 (continued): Chemical-Specific Physical and Chemical Properties**

| Compound                                           | H                    | log(K <sub>oc</sub> )               | S <sub>aq</sub>    | D <sub>air</sub>     | D <sub>wat</sub>     |
|----------------------------------------------------|----------------------|-------------------------------------|--------------------|----------------------|----------------------|
|                                                    | Henry's Law Constant | Organic Water Partition Coefficient | Aqueous Solubility | Diffusion in Air     | Diffusion in Water   |
|                                                    | (-)                  | (-)                                 | (mg/l)             | (cm <sup>2</sup> /s) | (cm <sup>2</sup> /s) |
| Toluene                                            | 2.7E-1               | 2.3E+0                              | 5.3E+2             | 8.7E-2               | 8.6E-6               |
| Trimethylbenzene, 1,2,4-                           | 1.8E-1               | 3.0E+0                              | 5.7E+1             | 6.2E-2               | 7.3E-6               |
| Trimethylbenzene, 1,3,5-                           | 2.7E-1               | 3.0E+0                              | 5.1E+1             | 6.2E-2               | 7.2E-6               |
| Xylenes (mixed isomers)                            | 2.2E-1               | 3.2E+0                              | 1.8E+2             | 7.1E-2               | 9.3E-6               |
| <b>Total Petroleum Hydrocarbon (TPH) Fractions</b> |                      |                                     |                    |                      |                      |
| TPH - Aliphatic >C05-C06                           | 3.2E+1               | 2.9E+0                              | 3.6E+1             | 1.0E-1               | 1.0E-5               |
| TPH - Aliphatic >C06-C08                           | 5.0E+1               | 3.6E+0                              | 5.4E+0             | 1.0E-1               | 1.0E-5               |
| TPH - Aliphatic >C08-C10                           | 8.0E+1               | 4.5E+0                              | 4.3E-1             | 1.0E-1               | 1.0E-5               |
| TPH - Aliphatic >C10-C12                           | 1.2E+2               | 5.4E+0                              | 3.4E-2             | 1.0E-1               | 1.0E-5               |
| TPH - Aliphatic >C12-C16                           | 5.2E+2               | 6.7E+0                              | 7.6E-4             | 1.0E-1               | 1.0E-5               |
| TPH - Aliphatic >C16-C21                           | 4.9E+3               | 8.8E+0                              | 2.5E-6             | 1.0E-1               | 1.0E-5               |
| TPH - Aromatic >C10-C12                            | 1.4E-1               | 3.4E+0                              | 1.5E+1             | 1.0E-1               | 1.0E-5               |
| TPH - Aromatic >C12-C16                            | 5.3E-2               | 3.7E+0                              | 5.8E+0             | 1.0E-1               | 1.0E-5               |
| TPH - Aromatic >C16-C21                            | 1.3E-2               | 4.2E+0                              | 6.5E-1             | 1.0E-1               | 1.0E-5               |
| TPH - Aromatic >C21-C35                            | 6.7E-4               | 5.1E+0                              | 6.6E-3             | 1.0E-1               | 1.0E-5               |



**Table S5: Chemical-Specific Toxicological Parameters**

| Compound                       | RfD <sub>O</sub>    |     | RfC <sub>i</sub>                   |     | SF <sub>O</sub>         |     | URF <sub>i</sub>                   |     | ABS <sub>d</sub>         |     | ABS <sub>GI</sub>                  |     |
|--------------------------------|---------------------|-----|------------------------------------|-----|-------------------------|-----|------------------------------------|-----|--------------------------|-----|------------------------------------|-----|
|                                | Oral Reference Dose |     | Inhalation Reference Concentration |     | Oral Slope Factor       |     | Inhalation Unit Risk Factor        |     | Dermal Absorption Factor |     | Gastrointestinal Absorption Factor |     |
|                                | (mg/kg/d)           | ref | (mg/m <sup>3</sup> )               | ref | (mg/kg/d) <sup>-1</sup> | ref | (ug/m <sup>3</sup> ) <sup>-1</sup> | ref | (-)                      | ref | (-)                                | ref |
| <b>Individual Constituents</b> |                     |     |                                    |     |                         |     |                                    |     |                          |     |                                    |     |
| Acenaphthene                   | 6.0E-2              | B   | -                                  | -   | 2.0E-4                  | A   | -                                  | -   | 1.3E-1                   | L   | 1.0E+0                             | L   |
| Acenaphthylene                 | 5.0E-2              | A   | -                                  | -   | 2.0E-3                  | A   | -                                  | -   | 1.3E-1                   | L   | 1.0E+0                             | L   |
| Anthracene                     | 3.0E-1              | B   | -                                  | -   | -                       | -   | -                                  | -   | 1.3E-1                   | L   | 1.0E+0                             | L   |
| Benz-a-anthracene              | 5.0E-3              | A   | -                                  | -   | 2.0E-2                  | A   | 8.8E-5                             | C   | 1.3E-1                   | L   | 1.0E+0                             | L   |
| Benzene                        | 4.0E-3              | B   | 3.0E-2                             | B   | 3.0E-2                  | B   | 2.2E-6                             | B   | 0.0E+0                   | L   | 1.0E+0                             | L   |
| Benzo-a-pyrene                 | 5.0E-4              | A   | 2.5E-7                             | K   | 7.3E+0                  | B   | 8.7E-2                             | D   | 1.3E-1                   | L   | 1.0E+0                             | L   |
| Benzo-b-fluoranthene           | 5.0E-3              | A   | -                                  | -   | 2.0E-2                  | A   | 8.8E-5                             | C   | 1.3E-1                   | L   | 1.0E+0                             | L   |
| Benzo-e-pyrene                 | 3.0E-2              | A   | -                                  | -   | -                       | -   | -                                  | -   | 1.3E-1                   | L   | 8.9E-1                             | L   |
| Benzo-g,h,i-perylene           | 3.0E-2              | A   | -                                  | -   | -                       | -   | -                                  | -   | 1.3E-1                   | L   | 1.0E+0                             | L   |
| Biphenyl, 1,1-                 | 5.0E-2              | B   | -                                  | -   | -                       | -   | -                                  | -   | 1.0E-1                   | L   | 5.0E-1                             | L   |
| Chrysene                       | 5.0E-2              | A   | -                                  | -   | 2.0E-3                  | A   | 8.8E-7                             | C   | 1.3E-1                   | L   | 1.0E+0                             | L   |
| Cumene                         | 1.0E-1              | B   | 4.0E-1                             | B   | -                       | -   | -                                  | -   | 0.0E+0                   | L   | 8.0E-1                             | L   |
| Cyclohexane                    | -                   | -   | 6.0E+0                             | B   | -                       | -   | -                                  | -   | 0.0E+0                   | L   | 8.0E-1                             | L   |
| Dibromoethane, 1,2- (EDB)      | 9.0E-3              | B   | 9.0E-3                             | B   | 2.0E+0                  | B   | 6.0E-4                             | B   | 3.0E-2                   | L   | 1.0E+0                             | L   |
| Dichloroethane, 1,2- (EDC)     | 1.4E-2              | A   | 4.8E-2                             | A   | 9.1E-2                  | B   | 2.6E-5                             | B   | 3.0E-2                   | L   | 1.0E+0                             | L   |
| Diisopropyl ether (DIPE)       | 5.0E-2              | E   | 4.0E-1                             | E   | -                       | -   | -                                  | -   | 3.0E-2                   | L   | 1.0E+0                             | L   |
| Ethyl benzene                  | 1.0E-1              | B   | 1.0E+0                             | B   | -                       | -   | -                                  | -   | 0.0E+0                   | L   | 1.0E+0                             | L   |
| Ethyl tert-butyl ether (ETBE)  | 2.5E-1              | I   | 3.0E-1                             | B   | -                       | -   | -                                  | -   | 5.0E-2                   | L   | 1.0E+0                             | L   |
| Fluoranthene                   | 4.0E-2              | B   | -                                  | -   | 2.0E-3                  | A   | -                                  | -   | 1.3E-1                   | L   | 1.0E+0                             | L   |
| Fluorene                       | 4.0E-2              | B   | -                                  | -   | -                       | -   | -                                  | -   | 1.3E-1                   | L   | 1.0E+0                             | L   |
| Heptane, n-                    | 2.0E+0              | F   | 7.0E+0                             | F   | -                       | -   | -                                  | -   | 0.0E+0                   | L   | 8.0E-1                             | L   |
| Hexane, n-                     | 6.0E-2              | G   | 6.7E-1                             | B   | -                       | -   | -                                  | -   | 0.0E+0                   | L   | 8.0E-1                             | L   |
| Indeno-1,2,3-cd-pyrene         | 5.0E-3              | A   | -                                  | -   | 2.0E-2                  | A   | 8.8E-5                             | C   | 1.3E-1                   | L   | 1.1E+1                             | L   |
| Methyl cyclohexane             | -                   | -   | 3.0E+0                             | G   | -                       | -   | -                                  | -   | 0.0E+0                   | L   | 1.0E+0                             | L   |
| Methyl naphthalene, 1-         | 7.0E-2              | H   | -                                  | -   | -                       | -   | -                                  | -   | 0.0E+0                   | L   | 1.0E+0                             | L   |
| Methyl naphthalene, 2-         | 4.0E-3              | B   | -                                  | -   | -                       | -   | -                                  | -   | 0.0E+0                   | L   | 1.0E+0                             | L   |
| Methyl tert-butyl ether (MTBE) | 3.0E-1              | I   | 3.0E+0                             | B   | -                       | -   | -                                  | -   | 5.0E-2                   | L   | 1.0E+0                             | L   |
| Naphthalene                    | 2.0E-2              | B   | 3.0E-3                             | B   | -                       | -   | -                                  | -   | 1.3E-1                   | L   | 1.0E+0                             | L   |
| Phenanthrene                   | 4.0E-2              | A   | -                                  | -   | -                       | -   | -                                  | -   | 1.3E-1                   | L   | 1.0E+0                             | L   |

**Table S5 (continued): Chemical-Specific Toxicological Parameters**

| Compound                                           | RfD <sub>O</sub>    |     | RfC <sub>i</sub>                   |     | SF <sub>O</sub>         |     | URF <sub>i</sub>                   |     | ABS <sub>d</sub>         |     | ABS <sub>GI</sub>                  |     |
|----------------------------------------------------|---------------------|-----|------------------------------------|-----|-------------------------|-----|------------------------------------|-----|--------------------------|-----|------------------------------------|-----|
|                                                    | Oral Reference Dose |     | Inhalation Reference Concentration |     | Oral Slope Factor       |     | Inhalation Unit Risk Factor        |     | Dermal Absorption Factor |     | Gastrointestinal Absorption Factor |     |
|                                                    | (mg/kg/d)           | ref | (mg/m <sup>3</sup> )               | ref | (mg/kg/d) <sup>-1</sup> | ref | (ug/m <sup>3</sup> ) <sup>-1</sup> | ref | (-)                      | ref | (-)                                | ref |
| Pyrene                                             | 3.0E-2              | B   | -                                  | -   | -                       | -   | -                                  | -   | 1.3E-1                   | L   | 1.0E+0                             | L   |
| Tert-amyl-methyl ether (TAME)                      | 1.3E-1              | E   | 1.9E-1                             | E   | -                       | -   | -                                  | -   | 3.0E-2                   | L   | 1.0E+0                             | L   |
| Tert-butyl alcohol (TBA)                           | 2.2E-1              | E   | 6.3E-2                             | E   | -                       | -   | -                                  | -   | 0.0E+0                   | L   | 1.0E+0                             | L   |
| Toluene                                            | 8.0E-2              | B   | 5.0E+0                             | B   | -                       | -   | -                                  | -   | 0.0E+0                   | L   | 1.0E+0                             | L   |
| Trimethylbenzene, 1,2,4-                           | 4.0E-1              | J   | 3.0E+0                             | J   | -                       | -   | -                                  | -   | 0.0E+0                   | L   | 8.0E-1                             | L   |
| Trimethylbenzene, 1,3,5-                           | 4.0E-1              | J   | 3.0E+0                             | J   | -                       | -   | -                                  | -   | 0.0E+0                   | L   | 8.0E-1                             | L   |
| Xylenes (mixed isomers)                            | 2.0E-1              | B   | 1.0E-1                             | B   | -                       | -   | -                                  | -   | 3.0E-2                   | L   | 1.0E+0                             | L   |
| <b>Total Petroleum Hydrocarbon (TPH) Fractions</b> |                     |     |                                    |     |                         |     |                                    |     |                          |     |                                    |     |
| TPH - Aliphatic >C05-C06                           | 5.0E+0              | F   | 1.8E+1                             | F   | -                       | -   | -                                  | -   | 0.0E+0                   | F   | 8.0E-1                             | F   |
| TPH - Aliphatic >C06-C08                           | 5.0E+0              | F   | 1.8E+1                             | F   | -                       | -   | -                                  | -   | 0.0E+0                   | F   | 1.0E+0                             | F   |
| TPH - Aliphatic >C08-C10                           | 1.0E-1              | F   | 1.0E+0                             | F   | -                       | -   | -                                  | -   | 0.0E+0                   | F   | 1.0E+0                             | F   |
| TPH - Aliphatic >C10-C12                           | 1.0E-1              | F   | 1.0E+0                             | F   | -                       | -   | -                                  | -   | 0.0E+0                   | F   | 1.0E+0                             | F   |
| TPH - Aliphatic >C12-C16                           | 1.0E-1              | F   | 1.0E+0                             | F   | -                       | -   | -                                  | -   | 1.0E-1                   | F   | 1.0E+0                             | F   |
| TPH - Aliphatic >C16-C21                           | 2.0E+0              | F   | -                                  | F   | -                       | -   | -                                  | -   | 1.0E-1                   | F   | 1.0E+0                             | F   |
| TPH - Aromatic >C10-C12                            | 4.0E-2              | F   | 2.0E-1                             | F   | -                       | -   | -                                  | -   | 0.0E+0                   | F   | 1.0E+0                             | F   |
| TPH - Aromatic >C12-C16                            | 4.0E-2              | F   | 2.0E-1                             | F   | -                       | -   | -                                  | -   | 1.0E-1                   | F   | 1.0E+0                             | F   |
| TPH - Aromatic >C16-C21                            | 3.0E-2              | F   | -                                  | F   | -                       | -   | -                                  | -   | 1.0E-1                   | F   | 1.0E+0                             | F   |
| TPH - Aromatic >C21-C35                            | 3.0E-2              | F   | -                                  | F   | -                       | -   | -                                  | -   | 1.0E-1                   | F   | 1.0E+0                             | F   |

Reference key:

|                       |                                 |                             |                             |
|-----------------------|---------------------------------|-----------------------------|-----------------------------|
| A Baars et al., 2001. | D Shell Global Solutions, 2004. | G ATSDR, 2012.              | J Environment Agency, 2002. |
| B USEPA, 1993.        | E TPHCWG, 1997.                 | H Tiesjema and Baars, 2009. | K USEPA, 2004c              |
| C WHO, 2010.          | F USEPA, 1997b.                 | I Firth, 2008.              |                             |

**Table S6: Fuel-Specific Parameters: Gasoline / Petrol**

| <b>Liquid Density: 0.72 kg/L</b>               |                                            |                      |                             |                                                   |                                                |
|------------------------------------------------|--------------------------------------------|----------------------|-----------------------------|---------------------------------------------------|------------------------------------------------|
| <b>Average Molecular Weight: 100 g/mol</b>     |                                            |                      |                             |                                                   |                                                |
| <b>Compound</b>                                | <b>MF</b>                                  | <b>X</b>             | <b>S<sub>eff</sub></b>      | <b>C<sub>sat</sub><sup>soil</sup></b>             | <b>C<sub>max</sub><sup>soil</sup></b>          |
|                                                | <b>Upper-End Mass Fraction<sup>†</sup></b> | <b>Mole Fraction</b> | <b>Effective Solubility</b> | <b>Soil Saturation Concentration (Inhalation)</b> | <b>Max Soil Concentration (Direct Contact)</b> |
|                                                | <b>(-)</b>                                 | <b>(-)</b>           | <b>(mg/l)</b>               | <b>(mg/kg)</b>                                    | <b>(mg/kg)</b>                                 |
| <b>Individual Constituents</b>                 |                                            |                      |                             |                                                   |                                                |
| Benzene                                        | 1.9E-2                                     | 2.4E-2               | 4.3E+1                      | 3.0E+1                                            | 2.1E+3                                         |
| Cumene                                         | 1.3E-3                                     | 1.1E-3               | 5.4E-2                      | 1.9E+0                                            | 1.4E+2                                         |
| Cyclohexane                                    | 3.9E-3                                     | 4.6E-3               | 2.0E-1                      | 1.7E+0                                            | 4.3E+2                                         |
| Dibromoethane, 1,2- (EDB)                      | 4.1E-4                                     | 2.2E-4               | 8.5E-1                      | 2.4E+0                                            | 4.5E+1                                         |
| Dichloroethane, 1,2- (EDC)                     | 4.4E-4                                     | 4.4E-4               | 3.8E+0                      | 6.0E+0                                            | 4.8E+1                                         |
| Diisopropyl ether (DIPE)                       | 1.5E-1                                     | 1.5E-1               | 3.9E+2                      | 2.9E+2                                            | 1.7E+4                                         |
| Ethyl benzene                                  | 1.7E-2                                     | 1.6E-2               | 2.7E+0                      | 1.0E+1                                            | 1.9E+3                                         |
| Ethyl tert-butyl ether (ETBE)                  | 1.5E-1                                     | 1.5E-1               | 1.8E+3                      | 4.8E+3                                            | 1.7E+4                                         |
| Heptane, n-                                    | 1.1E-2                                     | 1.1E-2               | 2.9E-2                      | 2.4E+0                                            | 1.2E+3                                         |
| Hexane, n-                                     | 2.4E-2                                     | 2.8E-2               | 3.6E-1                      | 4.3E+0                                            | 2.6E+3                                         |
| Methyl cyclohexane                             | 5.8E-3                                     | 5.9E-3               | 6.1E-2                      | 1.5E+0                                            | 6.4E+2                                         |
| Methyl naphthalene, 1-                         | 7.0E-4                                     | 4.9E-4               | 1.4E-2                      | 3.2E-1                                            | 7.7E+1                                         |
| Methyl naphthalene, 2-                         | 1.8E-3                                     | 1.3E-3               | 3.2E-2                      | 1.4E+0                                            | 2.0E+2                                         |
| Methyl tert-butyl ether (MTBE)                 | 1.1E-1                                     | 1.2E-1               | 6.4E+3                      | 5.4E+3                                            | 1.2E+4                                         |
| Naphthalene                                    | 2.5E-3                                     | 2.0E-3               | 6.0E-2                      | 1.2E+0                                            | 2.8E+2                                         |
| Tert-amyl-methyl ether (TAME)                  | 1.5E-1                                     | 1.5E-1               | 3.9E+2                      | 1.0E+3                                            | 1.7E+4                                         |
| Tert-butyl alcohol (TBA)                       | --                                         | --                   | 5.0E+2 *                    | 1.4E+3                                            | 1.4E+3 *                                       |
| Toluene                                        | 8.1E-2                                     | 8.8E-2               | 4.6E+1                      | 8.9E+1                                            | 8.9E+3                                         |
| Trimethylbenzene, 1,2,4-                       | 3.0E-2                                     | 2.5E-2               | 1.4E+0                      | 1.3E+1                                            | 3.3E+3                                         |
| Trimethylbenzene, 1,3,5-                       | 9.8E-3                                     | 8.2E-3               | 4.2E-1                      | 4.3E+0                                            | 1.1E+3                                         |
| <b>Total Petroleum Hydrocarbon Fractions †</b> |                                            |                      |                             |                                                   |                                                |
| TPH - Aliphatic >C05-C06                       | 2.2E-1                                     | 2.7E-1               | 9.8E+0                      | 1.3E+2                                            | 2.4E+4                                         |
| TPH - Aliphatic >C06-C08                       | 3.1E-1                                     | 3.1E-1               | 1.7E+0                      | 8.0E+1                                            | 3.4E+4                                         |
| TPH - Aliphatic >C08-C10                       | 6.8E-2                                     | 5.2E-2               | 2.2E-2                      | 7.4E+0                                            | 7.5E+3                                         |
| TPH - Aliphatic >C10-C12                       | 3.1E-2                                     | 1.9E-2               | 6.6E-4                      | 1.7E+0                                            | 3.4E+3                                         |
| TPH - Aliphatic >C12-C16                       | 1.0E-2                                     | 5.0E-3               | 3.8E-6                      | 1.9E-1                                            | 1.1E+3                                         |
| TPH - Aliphatic >C16-C21                       | 1.0E-2                                     | 3.7E-3               | 9.3E-9                      | 5.8E-2                                            | 1.1E+3                                         |
| TPH - Aromatic >C10-C12                        | 2.5E-2                                     | 1.9E-2               | 4.8E-1                      | 1.2E+1                                            | 2.8E+3                                         |
| TPH - Aromatic >C12-C16                        | 1.0E-3                                     | 6.7E-4               | 3.9E-3                      | 1.9E-1                                            | 1.1E+2                                         |
| TPH - Aromatic >C16-C21                        | 1.0E-3                                     | 5.3E-4               | 3.4E-4                      | 5.4E-2                                            | 1.1E+2                                         |
| TPH - Aromatic >C21-C35                        | 1.0E-4                                     | 4.2E-5               | 2.8E-7                      | 3.5E-4                                            | 1.1E+1                                         |

Notes:

- 1) † References for upper-end mass fractions: TPHCWG (1998; Table 4) and SGS (2009).
- 2) See Table2 for equations used to calculate C<sub>sat</sub> and C<sub>max</sub>.
- 3) \* Reference for TBA: Figure 2A of API, 2005 (maximum observed concentration in groundwater).

**Table S7: Fuel-Specific Parameters: Diesel / Gas oil**

| <b>Liquid Density: 0.83 kg/L</b>               |                                 |                      |                             |                                                   |                                                |
|------------------------------------------------|---------------------------------|----------------------|-----------------------------|---------------------------------------------------|------------------------------------------------|
| <b>Average Molecular Weight: 200 g/mol</b>     |                                 |                      |                             |                                                   |                                                |
| <b>Compound</b>                                | <b>MF</b>                       | <b>X</b>             | <b>S<sub>eff</sub></b>      | <b>C<sub>sat</sub><sup>soil</sup></b>             | <b>C<sub>max</sub><sup>soil</sup></b>          |
|                                                | <b>Upper-End Mass Fraction†</b> | <b>Mole Fraction</b> | <b>Effective Solubility</b> | <b>Soil Saturation Concentration (Inhalation)</b> | <b>Max Soil Concentration (Direct Contact)</b> |
|                                                | <b>(-)</b>                      | <b>(-)</b>           | <b>(mg/l)</b>               | <b>(mg/kg)</b>                                    | <b>(mg/kg)</b>                                 |
| <b>Individual Constituents</b>                 |                                 |                      |                             |                                                   |                                                |
| Anthracene                                     | 7.5E-5                          | 8.4E-5               | 3.7E-8                      | 1.1E-5                                            | 9.5E+0                                         |
| Benz-a-anthracene                              | 1.4E-6                          | 1.2E-6               | 1.2E-10                     | 4.6E-7                                            | 1.8E-1                                         |
| Benzene                                        | 8.4E-4                          | 2.2E-3               | 3.8E-2                      | 2.6E-2                                            | 1.1E+2                                         |
| Benzo-a-pyrene                                 | 2.3E-6                          | 1.8E-6               | 2.9E-11                     | 3.0E-7                                            | 2.9E-1                                         |
| Benzo-b-fluoranthene                           | 7.6E-7                          | 6.0E-7               | 9.0E-12                     | 1.1E-7                                            | 9.6E-2                                         |
| Benzo-e-pyrene                                 | 5.6E-7                          | 4.4E-7               | 3.8E-12                     | 1.5E-7                                            | 7.1E-2                                         |
| Benzo-g,h,i-perylene                           | 2.1E-7                          | 1.5E-7               | 3.9E-13                     | 3.7E-10                                           | 2.6E-2                                         |
| Biphenyl, 1,1-                                 | 6.3E-4                          | 8.2E-4               | 6.1E-5                      | 3.1E-3                                            | 8.0E+1                                         |
| Chrysene                                       | 2.1E-6                          | 1.8E-6               | 2.9E-11                     | 1.2E-7                                            | 2.6E-1                                         |
| Cumene                                         | 4.7E-5                          | 7.8E-5               | 3.9E-3                      | 1.4E-1                                            | 6.0E+0                                         |
| Ethyl benzene                                  | 1.3E-3                          | 2.4E-3               | 4.0E-3                      | 1.5E-2                                            | 1.6E+2                                         |
| Fluoranthene                                   | 6.6E-5                          | 6.5E-5               | 1.3E-7                      | 1.4E-4                                            | 8.3E+0                                         |
| Fluorene                                       | 9.1E-4                          | 1.1E-3               | 2.2E-5                      | 3.0E-3                                            | 1.2E+2                                         |
| Indeno-1,2,3-cd-pyrene                         | 3.8E-7                          | 2.8E-7               | 6.1E-14                     | 2.1E-9                                            | 4.8E-2                                         |
| Methyl naphthalene, 1-                         | 6.5E-3                          | 9.2E-3               | 2.6E-3                      | 5.9E-2                                            | 8.3E+2                                         |
| Methyl naphthalene, 2-                         | 1.2E-2                          | 1.7E-2               | 4.3E-3                      | 1.9E-1                                            | 1.5E+3                                         |
| Naphthalene                                    | 3.0E-3                          | 4.6E-3               | 1.4E-3                      | 2.9E-2                                            | 3.7E+2                                         |
| Phenanthrene                                   | 1.1E-3                          | 1.2E-3               | 1.0E-5                      | 7.3E-4                                            | 1.4E+2                                         |
| Pyrene                                         | 5.8E-5                          | 5.7E-5               | 7.7E-8                      | 8.1E-5                                            | 7.4E+0                                         |
| Toluene                                        | 2.8E-3                          | 6.1E-3               | 3.2E-2                      | 6.1E-2                                            | 3.5E+2                                         |
| Trimethylbenzene, 1,3,5-                       | 3.1E-3                          | 5.2E-3               | 2.7E-3                      | 2.8E-2                                            | 4.0E+2                                         |
| Xylenes (mixed isomers)                        | 3.6E-3                          | 6.7E-3               | 1.2E-2                      | 1.5E-1                                            | 4.5E+2                                         |
| <b>Total Petroleum Hydrocarbon Fractions †</b> |                                 |                      |                             |                                                   |                                                |
| TPH - Aliphatic >C05-C06                       | 0.0E+0                          | 0.0E+0               | 9.8E+0                      | 1.3E+2                                            | 0.0E+0                                         |
| TPH - Aliphatic >C06-C08                       | 1.1E-3                          | 2.2E-3               | 1.7E+0                      | 8.0E+1                                            | 1.4E+2                                         |
| TPH - Aliphatic >C08-C10                       | 1.3E-2                          | 2.1E-2               | 2.2E-2                      | 7.4E+0                                            | 1.7E+3                                         |
| TPH - Aliphatic >C10-C12                       | 5.4E-2                          | 6.7E-2               | 2.3E-5                      | 5.8E-2                                            | 6.8E+3                                         |
| TPH - Aliphatic >C12-C16                       | 3.1E-1                          | 3.1E-1               | 2.3E-6                      | 1.2E-1                                            | 3.9E+4                                         |
| TPH - Aliphatic >C16-C21                       | 4.2E-1                          | 3.1E-1               | 7.8E-9                      | 4.9E-2                                            | 5.3E+4                                         |
| TPH - Aromatic >C10-C12                        | 5.3E-2                          | 8.2E-2               | 2.0E-2                      | 5.1E-1                                            | 6.7E+3                                         |
| TPH - Aromatic >C12-C16                        | 7.8E-2                          | 1.0E-1               | 6.0E-3                      | 3.0E-1                                            | 9.9E+3                                         |
| TPH - Aromatic >C16-C21                        | 2.7E-4                          | 2.8E-4               | 1.8E-6                      | 2.9E-4                                            | 3.4E+1                                         |
| TPH - Aromatic >C21-C35                        | 4.3E-6                          | 3.6E-6               | 2.4E-10                     | 3.0E-7                                            | 5.4E-1                                         |

Notes:

- 1) † References for upper-end mass fractions: TPHCWG (1998; Tables 10 and 11) and Chevron (2007).
- 2) See Table2 for equations used to calculate C<sub>sat</sub> and C<sub>max</sub>.

**Table S8: Fuel-Specific Parameters: Kerosene / Jet Fuel**

| <b>Liquid Density: 0.80 kg/L</b>               |                                            |                      |                             |                                                   |                                                |
|------------------------------------------------|--------------------------------------------|----------------------|-----------------------------|---------------------------------------------------|------------------------------------------------|
| <b>Average Molecular Weight: 170 g/mol</b>     |                                            |                      |                             |                                                   |                                                |
| <b>Compound</b>                                | <b>MF</b>                                  | <b>X</b>             | <b>S<sub>eff</sub></b>      | <b>C<sub>sat</sub><sup>soil</sup></b>             | <b>C<sub>max</sub><sup>soil</sup></b>          |
|                                                | <b>Upper-End Mass Fraction<sup>†</sup></b> | <b>Mole Fraction</b> | <b>Effective Solubility</b> | <b>Soil Saturation Concentration (Inhalation)</b> | <b>Max Soil Concentration (Direct Contact)</b> |
|                                                | <b>(-)</b>                                 | <b>(-)</b>           | <b>(mg/l)</b>               | <b>(mg/kg)</b>                                    | <b>(mg/kg)</b>                                 |
| <b>Individual Constituents</b>                 |                                            |                      |                             |                                                   |                                                |
| Acenaphthene                                   | 4.7E-5                                     | 5.2E-5               | 2.2E-6                      | 1.6E-4                                            | 5.8E+0                                         |
| Acenaphthylene                                 | 4.5E-5                                     | 5.0E-5               | 2.0E-6                      | 7.7E-5                                            | 5.5E+0                                         |
| Anthracene                                     | 1.2E-6                                     | 1.1E-6               | 5.0E-10                     | 1.5E-7                                            | 1.5E-1                                         |
| Benzene                                        | 5.0E-3                                     | 1.1E-2               | 1.9E-1                      | 1.3E-1                                            | 6.1E+2                                         |
| Ethyl benzene                                  | 7.0E-3                                     | 1.1E-2               | 1.9E-2                      | 7.1E-2                                            | 8.6E+2                                         |
| Fluoranthene                                   | 8.6E-6                                     | 7.2E-6               | 1.5E-8                      | 1.6E-5                                            | 1.1E+0                                         |
| Fluorene                                       | 4.2E-5                                     | 4.3E-5               | 8.5E-7                      | 1.2E-4                                            | 5.1E+0                                         |
| Heptane, n-                                    | 7.3E-3                                     | 1.2E-2               | 3.3E-4                      | 2.7E-2                                            | 8.9E+2                                         |
| Methyl naphthalene, 1-                         | 5.4E-3                                     | 6.5E-3               | 1.8E-3                      | 4.2E-2                                            | 6.6E+2                                         |
| Methyl naphthalene, 2-                         | 1.1E-2                                     | 1.3E-2               | 3.3E-3                      | 1.4E-1                                            | 1.3E+3                                         |
| Naphthalene                                    | 3.1E-3                                     | 4.1E-3               | 1.3E-3                      | 2.6E-2                                            | 3.8E+2                                         |
| Phenanthrene                                   | 5.8E-4                                     | 5.5E-4               | 4.5E-6                      | 3.3E-4                                            | 7.1E+1                                         |
| Pyrene                                         | 2.4E-6                                     | 2.0E-6               | 2.7E-9                      | 2.9E-6                                            | 2.9E-1                                         |
| Toluene                                        | 1.6E-2                                     | 3.0E-2               | 1.6E-1                      | 3.0E-1                                            | 2.0E+3                                         |
| Trimethylbenzene, 1,3,5-                       | 2.0E-2                                     | 2.8E-2               | 1.5E-2                      | 1.5E-1                                            | 2.4E+3                                         |
| Xylenes (mixed isomers)                        | 2.5E-2                                     | 4.0E-2               | 7.0E-2                      | 8.9E-1                                            | 3.1E+3                                         |
| <b>Total Petroleum Hydrocarbon Fractions †</b> |                                            |                      |                             |                                                   |                                                |
| TPH - Aliphatic >C05-C06                       | 3.7E-2                                     | 7.8E-2               | 2.8E-2                      | 3.6E-1                                            | 4.5E+3                                         |
| TPH - Aliphatic >C06-C08                       | 1.6E-1                                     | 2.7E-1               | 1.5E-2                      | 7.0E-1                                            | 2.0E+4                                         |
| TPH - Aliphatic >C08-C10                       | 2.8E-1                                     | 3.7E-1               | 1.6E-3                      | 5.2E-1                                            | 3.4E+4                                         |
| TPH - Aliphatic >C10-C12                       | 3.0E-1                                     | 3.2E-1               | 1.1E-4                      | 2.8E-1                                            | 3.7E+4                                         |
| TPH - Aliphatic >C12-C16                       | 2.5E-1                                     | 2.1E-1               | 1.6E-6                      | 8.1E-2                                            | 3.1E+4                                         |
| TPH - Aliphatic >C16-C21                       | 3.0E-2                                     | 1.9E-2               | 4.7E-10                     | 3.0E-3                                            | 3.7E+3                                         |
| TPH - Aromatic >C10-C12                        | 6.0E-2                                     | 7.8E-2               | 1.9E-2                      | 4.9E-1                                            | 7.3E+3                                         |
| TPH - Aromatic >C12-C16                        | 1.1E-1                                     | 1.3E-1               | 7.5E-3                      | 3.8E-1                                            | 1.4E+4                                         |
| TPH - Aromatic >C16-C21                        | 5.4E-3                                     | 4.8E-3               | 3.1E-5                      | 5.0E-3                                            | 6.6E+2                                         |
| TPH - Aromatic >C21-C35                        | 1.0E-4                                     | 7.1E-5               | 4.7E-9                      | 5.9E-6                                            | 1.2E+1                                         |

Notes:

- 1) † References for upper-end mass fractions: TPHCWG (1998; Table 5) and CONCAWE (2007).
- 2) See Table2 for equations used to calculate C<sub>sat</sub> and C<sub>max</sub>.

## References

- ASTM. 2010. *Standard Guide for Risk-Based Corrective Action Applied at Petroleum Release Sites*. ASTM Standard E-1739-95(2010)e1. ASTM International, West Conshohocken, PA.
- ATSDSR. 2012. Minimal Risk Levels (MRLs) for Hazardous Substances. Agency for Toxic Substances and Disease Registry. <http://www.atsdr.cdc.gov/mrls/mrllist.asp>.
- Baars, A.J., Theelen, R.M.C., et al. 2001. *Re-evaluation of human-toxicological maximum permissible risk levels*. National Institute for Public Health and the Environment (RIVM) Report, 711701025.
- Chevron. 2007. Diesel Fuels Technical Review. Chevron Products Company, San Ramon, CA. [http://www.chevronwithtechron.com/products/documents/Diesel\\_Fuel\\_Tech\\_Review.pdf](http://www.chevronwithtechron.com/products/documents/Diesel_Fuel_Tech_Review.pdf).
- CONCAWE. 2007. *Human Exposure Information for EU Substance Risk Assessment of Kerosine*. Report 6/07. Conservation of Clean Air and Water in Europe, Brussels.
- Environment Agency. 2002. Contaminants in Soil: Collation of Toxicological Data and Intake Values for Humans. Benzo(a)Pyrene. Environment Agency, Bristol.
- Firth, M.J. 2008. Derivation of a chronic reference dose and reference concentration for trimethylbenzenes and C9 aromatic hydrocarbon solvents. *Regulatory Toxicology and Pharmacology*, 52, 248–256.
- SGS. 2009. SGS Global Fuels Survey. Confidential dataset. SGS Germany GmbH, Hamburg.
- Shell Global Solutions (US) Inc. 2004. *Toxicity factors and risk-based screening levels for DIPE, ETBE, TAME, and TBA*. Internal Shell Global Solutions Report, OG.04.50728.
- Tiesjema, B. & Baars, A.J. 2009. *Re-evaluation of some human-toxicological Maximum Permissible Risk levels earlier evaluated in the period 1991–2001*. National Institute for Public Health and the Environment (RIVM) Report, 711701092.
- TPHCWG. 1997. *Development of Fraction Specific Reference Doses (RfDs) and Reference Concentrations (RfCs) for Total Petroleum Hydrocarbons (TPH)*. Total Petroleum Hydrocarbons (TPH) Criteria Working Group Series, Volume 4. Amherst Scientific Publishers, Amherst, MA. <http://www.aehsfoundation.org/Amherst-Scientific-Publishers.aspx>.
- TPHCWG. 1998. Composition of petroleum mixtures. Total Petroleum Hydrocarbons (TPH) Criteria Working Group Series, Volume 2. Amherst Scientific Publishers, Amherst, MA. <http://www.aehsfoundation.org/Amherst-Scientific-Publishers.aspx>.
- USEPA. 1993. *Provisional Guidance for Quantitative Risk Assessment of Polycyclic Aromatic Hydrocarbons*. EPA/600/R-93/089. US Environmental Protection Agency, Office of Research and Development, Washington, DC.
- USEPA. 1997a. *Exposure Factors Handbook—Volumes I–III*. EPA/600/P-95/002a through EPA/600/P-95/002c. US Environmental Protection Agency, National Center for Environmental Assessment, Office of Research and Development, Washington, DC.
- USEPA. 1997b. *Health Effects Assessment Summary Tables*, EPA/540/R-97/036. PB97-921199. US Environmental Protection Agency, Office of Solid Waste and Emergency Response, Washington, DC.
- USEPA. 2004a. *User's Guide for Evaluating Subsurface Vapor Intrusion into Buildings*, PN 030224.0002. US Environmental Protection Agency, Office of Emergency and Remedial Response, Washington, DC.
- USEPA. 2004b. *User's Guide for Evaluating Subsurface Vapor Intrusion into Buildings*, Table 9. February 22, 2004. [http://www.epa.gov/oswer/riskassessment/airmodel/pdf/2004\\_0222\\_3phase\\_users\\_guide.pdf](http://www.epa.gov/oswer/riskassessment/airmodel/pdf/2004_0222_3phase_users_guide.pdf).

USEPA. 2004c. *Risk Assessment Guidance for Superfund, Volume I: Human Health Evaluation Manual (Part E, Supplemental Guidance for Dermal Risk Assessment), Final, OSWER 9285.7-02EP*. EPA/540/R/99/005. PB99-963312. US Environmental Protection Agency, Office of Superfund Remediation and Technology Innovation, Washington, DC.

WHO. 2010. *WHO Guidelines for Indoor Air Quality: Selected Pollutants*. WHO European Centre for Environment and Health, Bonn Office, Bonn.

WHO. 2011. *Guidelines for Drinking-Water Quality*, 4<sup>th</sup> edn. World Health Organization, Geneva.
