# Supplementary material
Source: publisher figshare collection journal article supplement (https://geolsoc.figshare.com/articles/dataset/_/3453845)
Supplement: Supplementary file 2 [file 1]

CONTENTS file #2 of Supplemental data for Bowers RL & Smith JWN (2014)

Table S9 Relative Upper-Bound Risk Due to Exposure to Fuel Constituents: Gasoline / Petrol

Table S10 Relative Upper-Bound Risk Due to Exposure to Fuel Constituents: Kerosene / Jet Fuel

Table S11 Relative Upper-Bound Risk Due to Exposure to Fuel Constituents: Diesel / Fuel Oil

Table S.9 (page 1 of 6)

Relative Upper-Bound Risk Due to Exposure to Fuel Constituents: Gasoline / Petrol

| Direct NAPL Intrusion to Enclosed Space |                                              |                                             |                       |
|-----------------------------------------|----------------------------------------------|---------------------------------------------|-----------------------|
| Exposure Route:                         |                                              | Inhalation                                  |                       |
| Source Medium:                          |                                              | NAPL                                        |                       |
| Depth to Source (m):                    |                                              | 0                                           |                       |
| Note:                                   |                                              | Saturated vapor, diluted in breathing space |                       |
| Rank                                    | Constituent                                  | Inhalation Risk                             |                       |
|                                         |                                              | HQ <sub>max</sub>                           | CR <sub>max</sub>     |
| 1                                       | <b><i>Benzene</i></b>                        | <b><i>1.3E+03</i></b>                       | <b><i>3.8E-02</i></b> |
| 2                                       | <b><i>Dibromoethane, 1,2- (EDB)</i></b>      | <b><i>1.0E+01</i></b>                       | <b><i>2.4E-02</i></b> |
| 3                                       | <b><i>Dichloroethane, 1,2- (EDC)</i></b>     | <b><i>1.6E+01</i></b>                       | <b><i>8.4E-03</i></b> |
| 4                                       | <b><i>Diisopropyl ether (DIPE)</i></b>       | <b><i>6.6E+02</i></b>                       | -                     |
| 5                                       | <b><i>Ethyl tert-butyl ether (ETBE)</i></b>  | <b><i>5.9E+02</i></b>                       | -                     |
| 6                                       | <b><i>Tert-amyl-methyl ether (TAME)</i></b>  | <b><i>4.5E+02</i></b>                       | -                     |
| 7                                       | <b><i>Methyl tert-butyl ether (MTBE)</i></b> | <b><i>2.1E+02</i></b>                       | -                     |
| 8                                       | <b><i>Xylenes (mixed isomers)</i></b>        | <b><i>1.3E+02</i></b>                       | -                     |
| 9                                       | <b><i>Hexane, n-</i></b>                     | <b><i>1.0E+02</i></b>                       | -                     |
| 10                                      | <b><i>TPH - Aliphatic &gt; C05-C06</i></b>   | <b><i>7.3E+01</i></b>                       | -                     |
| 11                                      | <b><i>TPH - Aliphatic &gt;C06-C08</i></b>    | <b><i>1.9E+01</i></b>                       | -                     |
| 12                                      | <b><i>Tert-butyl alcohol (TBA)</i></b>       | <b><i>1.2E+01</i></b>                       | -                     |
| 13                                      | <b><i>Toluene</i></b>                        | <b><i>1.0E+01</i></b>                       | -                     |
| 14                                      | <b><i>TPH - Aliphatic &gt;C08-C10</i></b>    | <b><i>7.4E+00</i></b>                       | -                     |
| 15                                      | <b><i>Ethyl benzene</i></b>                  | <b><i>3.6E+00</i></b>                       | -                     |
| 16                                      | <b><i>Naphthalene</i></b>                    | <b><i>1.6E+00</i></b>                       | -                     |
| 17                                      | Heptane, n-                                  | 1.4E+00                                     | -                     |
| 18                                      | TPH - Aromatic >C10-C12                      | 1.4E+00                                     | -                     |
| 19                                      | Methyl cyclohexane                           | 1.3E+00                                     | -                     |
| 20                                      | Cyclohexane                                  | 9.0E-01                                     | -                     |
| 21                                      | Trimethylbenzene, 1,2,4-                     | 3.6E-01                                     | -                     |
| 22                                      | Cumene                                       | 3.4E-01                                     | -                     |
| 23                                      | TPH - Aliphatic >C10-C12                     | 3.2E-01                                     | -                     |
| 24                                      | Trimethylbenzene, 1,3,5-                     | 1.6E-01                                     | -                     |
| 25                                      | TPH - Aliphatic >C12-C16                     | 8.1E-03                                     | -                     |
| 26                                      | TPH - Aromatic >C12-C16                      | 4.2E-03                                     | -                     |

| Outdoor Inhalation - Vapors and Particulates |                                         |                   |                       |
|----------------------------------------------|-----------------------------------------|-------------------|-----------------------|
| Exposure Route:                              |                                         | Inhalation        |                       |
| Source Medium:                               |                                         | Surface Soil      |                       |
| Depth to Source (m):                         |                                         | 0                 |                       |
| Rank                                         | Constituent                             | Inhalation Risk   |                       |
|                                              |                                         | HQ <sub>max</sub> | CR <sub>max</sub>     |
| 1                                            | <b><i>Dibromoethane, 1,2- (EDB)</i></b> | 5.7E-03           | <b><i>1.3E-05</i></b> |
| 2                                            | <b><i>Benzene</i></b>                   | 2.1E-01           | <b><i>6.1E-06</i></b> |
| 3                                            | Dichloroethane, 1,2- (EDC)              | 9.1E-03           | <b><i>4.9E-06</i></b> |
| 4                                            | Ethyl tert-butyl ether (ETBE)           | 5.2E-01           | -                     |
| 5                                            | Tert-amyl-methyl ether (TAME)           | 2.7E-01           | -                     |
| 6                                            | Tert-butyl alcohol (TBA)                | 2.0E-01           | -                     |
| 7                                            | Diisopropyl ether (DIPE)                | 1.1E-01           | -                     |
| 8                                            | Methyl tert-butyl ether (MTBE)          | 1.1E-01           | -                     |
| 9                                            | Xylenes (mixed isomers)                 | 8.4E-02           | -                     |
| 10                                           | Hexane, n-                              | 7.3E-03           | -                     |
| 11                                           | TPH - Aliphatic > C05-C06               | 4.5E-03           | -                     |
| 12                                           | Naphthalene                             | 4.0E-03           | -                     |
| 13                                           | Toluene                                 | 2.5E-03           | -                     |
| 14                                           | TPH - Aliphatic >C06-C08                | 1.8E-03           | -                     |
| 15                                           | TPH - Aromatic >C10-C12                 | 1.8E-03           | -                     |
| 16                                           | TPH - Aliphatic >C08-C10                | 1.5E-03           | -                     |
| 17                                           | Ethyl benzene                           | 1.0E-03           | -                     |
| 18                                           | Cumene                                  | 2.0E-04           | -                     |
| 19                                           | Trimethylbenzene, 1,2,4-                | 2.0E-04           | -                     |
| 20                                           | TPH - Aliphatic >C10-C12                | 1.5E-04           | -                     |
| 21                                           | Methyl cyclohexane                      | 1.3E-04           | -                     |
| 22                                           | Heptane, n-                             | 1.1E-04           | -                     |
| 23                                           | Cyclohexane                             | 8.8E-05           | -                     |
| 24                                           | Trimethylbenzene, 1,3,5-                | 7.5E-05           | -                     |
| 25                                           | TPH - Aromatic >C12-C16                 | 1.3E-05           | -                     |
| 26                                           | TPH - Aliphatic >C12-C16                | 7.9E-06           | -                     |

Notes:

- Table presents ranking of risk-driving fuel constituents by exposure pathway.  
Constituent risk rank based on maximum degree of exceedance of either of two criteria: i) HQ<sub>max</sub> > 1.0, or ii) CR<sub>max</sub> > 1.0E-6.
- HQ<sub>max</sub> = Maximum estimated hazard quotient: Risks assume upper-end average concentration of each constituent in the fuel.
- CR<sub>max</sub> = Maximum estimated cancer risk: Risks assume upper-end average concentration of each constituent in the fuel.
- Constituents listed in bold italics are identified on Table 9 as potentially risk-driving Constituents of Potential Concern (COPCs) for the corresponding pathway.  
Individual compounds for which HQ>1, but not listed in bold are included among the highlighted TPH fractions, which are more broadly indicated as COPCs instead of those individual compounds.

Table S.9 (page 2 of 6)

Relative Upper-Bound Risk Due to Exposure to Fuel Constituents: Gasoline / Petrol

| Outdoor Inhalation - Vapors |                                          |                   |                       |
|-----------------------------|------------------------------------------|-------------------|-----------------------|
| Exposure Route:             |                                          | Inhalation        |                       |
| Source Medium:              |                                          | Groundwater       |                       |
| Depth to Source (m):        |                                          | 3                 |                       |
| Rank                        | Constituent                              | Inhalation Risk   |                       |
|                             |                                          | HQ <sub>max</sub> | CR <sub>max</sub>     |
| 1                           | <b><i>Benzene</i></b>                    | 1.0E-01           | <b><i>3.0E-06</i></b> |
| 2                           | <b><i>Dibromoethane, 1,2- (EDB)</i></b>  | 1.1E-03           | <b><i>2.7E-06</i></b> |
| 3                           | <b><i>Dichloroethane, 1,2- (EDC)</i></b> | 2.8E-03           | <b><i>1.5E-06</i></b> |
| 4                           | Ethyl tert-butyl ether (ETBE)            | 1.2E-01           | -                     |
| 5                           | Tert-amyl-methyl ether (TAME)            | 6.0E-02           | -                     |
| 6                           | Methyl tert-butyl ether (MTBE)           | 4.6E-02           | -                     |
| 7                           | Diisopropyl ether (DIPE)                 | 4.4E-02           | -                     |
| 8                           | Hexane, n-                               | 1.1E-02           | -                     |
| 9                           | Xylenes (mixed isomers)                  | 9.1E-03           | -                     |
| 10                          | Tert-butyl alcohol (TBA)                 | 6.6E-03           | -                     |
| 11                          | TPH - Aliphatic > C05-C06                | 4.0E-03           | -                     |
| 12                          | TPH - Aliphatic >C06-C08                 | 1.1E-03           | -                     |
| 13                          | Toluene                                  | 7.3E-04           | -                     |
| 14                          | TPH - Aliphatic >C08-C10                 | 4.1E-04           | -                     |
| 15                          | Naphthalene                              | 3.0E-04           | -                     |
| 16                          | Ethyl benzene                            | 2.1E-04           | -                     |
| 17                          | TPH - Aromatic >C10-C12                  | 1.4E-04           | -                     |
| 18                          | Methyl cyclohexane                       | 5.2E-05           | -                     |
| 19                          | Heptane, n-                              | 5.2E-05           | -                     |
| 20                          | Cyclohexane                              | 4.0E-05           | -                     |
| 21                          | Trimethylbenzene, 1,2,4-                 | 2.2E-05           | -                     |
| 22                          | TPH - Aliphatic >C10-C12                 | 1.8E-05           | -                     |
| 23                          | Cumene                                   | 1.5E-05           | -                     |
| 24                          | Trimethylbenzene, 1,3,5-                 | 8.3E-06           | -                     |
| 25                          | TPH - Aromatic >C12-C16                  | 7.1E-07           | -                     |
| 26                          | TPH - Aliphatic >C12-C16                 | 4.5E-07           | -                     |

| Indoor Vapor Intrusion (Convection Driven) |                                              |                           |                       |
|--------------------------------------------|----------------------------------------------|---------------------------|-----------------------|
| Exposure Route:                            |                                              | Inhalation                |                       |
| Source Medium:                             |                                              | Subsurface Soil           |                       |
| Depth to Source (m):                       |                                              | 0.15                      |                       |
| Note:                                      |                                              | Assumes no biodegradation |                       |
| Rank                                       | Constituent                                  | Inhalation Risk           |                       |
|                                            |                                              | HQ <sub>max</sub>         | CR <sub>max</sub>     |
| 1                                          | <b><i>Benzene</i></b>                        | <b><i>5.0E+01</i></b>     | <b><i>1.4E-03</i></b> |
| 2                                          | <b><i>Dichloroethane, 1,2- (EDC)</i></b>     | 7.0E-01                   | <b><i>3.8E-04</i></b> |
| 3                                          | <b><i>Dibromoethane, 1,2- (EDB)</i></b>      | 1.3E-01                   | <b><i>3.0E-04</i></b> |
| 4                                          | <b><i>Diisopropyl ether (DIPE)</i></b>       | <b><i>1.9E+01</i></b>     | -                     |
| 5                                          | <b><i>Ethyl tert-butyl ether (ETBE)</i></b>  | <b><i>1.8E+01</i></b>     | -                     |
| 6                                          | <b><i>Tert-amyl-methyl ether (TAME)</i></b>  | <b><i>1.4E+01</i></b>     | -                     |
| 7                                          | <b><i>Hexane, n-</i></b>                     | <b><i>8.9E+00</i></b>     | -                     |
| 8                                          | <b><i>Methyl tert-butyl ether (MTBE)</i></b> | <b><i>7.1E+00</i></b>     | -                     |
| 9                                          | <b><i>Xylenes (mixed isomers)</i></b>        | <b><i>4.0E+00</i></b>     | -                     |
| 10                                         | <b><i>TPH - Aliphatic &gt; C05-C06</i></b>   | <b><i>3.1E+00</i></b>     | -                     |
| 11                                         | <b><i>Tert-butyl alcohol (TBA)</i></b>       | <b><i>3.1E+00</i></b>     | -                     |
| 12                                         | TPH - Aliphatic >C06-C08                     | 8.2E-01                   | -                     |
| 13                                         | Toluene                                      | 3.9E-01                   | -                     |
| 14                                         | TPH - Aliphatic >C08-C10                     | 3.2E-01                   | -                     |
| 15                                         | Ethyl benzene                                | 1.2E-01                   | -                     |
| 16                                         | TPH - Aromatic >C10-C12                      | 5.9E-02                   | -                     |
| 17                                         | Naphthalene                                  | 4.1E-02                   | -                     |
| 18                                         | Heptane, n-                                  | 4.0E-02                   | -                     |
| 19                                         | Methyl cyclohexane                           | 4.0E-02                   | -                     |
| 20                                         | Cyclohexane                                  | 3.0E-02                   | -                     |
| 21                                         | TPH - Aliphatic >C10-C12                     | 1.4E-02                   | -                     |
| 22                                         | Trimethylbenzene, 1,2,4-                     | 9.5E-03                   | -                     |
| 23                                         | Cumene                                       | 9.4E-03                   | -                     |
| 24                                         | Trimethylbenzene, 1,3,5-                     | 4.2E-03                   | -                     |
| 25                                         | TPH - Aliphatic >C12-C16                     | 3.5E-04                   | -                     |
| 26                                         | TPH - Aromatic >C12-C16                      | 1.8E-04                   | -                     |

Notes:

- Table presents ranking of risk-driving fuel constituents by exposure pathway.  
Constituent risk rank based on maximum degree of exceedance of either of two criteria: i) HQ<sub>max</sub> > 1.0, or ii) CR<sub>max</sub> > 1.0E-6.
- HQ<sub>max</sub> = Maximum estimated hazard quotient: Risks assume upper-end average concentration of each constituent in the fuel.
- CR<sub>max</sub> = Maximum estimated cancer risk: Risks assume upper-end average concentration of each constituent in the fuel.
- Constituents listed in bold italics are identified on Table 9 as potentially risk-driving Constituents of Potential Concern (COPCs) for the corresponding pathway.

Table S.9 (page 3 of 6)

Relative Upper-Bound Risk Due to Exposure to Fuel Constituents: Gasoline / Petrol

| Indoor Vapor Intrusion (Diffusion Driven) |                                              |                           |                       |
|-------------------------------------------|----------------------------------------------|---------------------------|-----------------------|
| Exposure Route:                           |                                              | Inhalation                |                       |
| Source Medium:                            |                                              | Subsurface Soil           |                       |
| Depth to Source (m):                      |                                              | 0.15                      |                       |
| Note:                                     |                                              | Assumes no biodegradation |                       |
| Rank                                      | Constituent                                  | Inhalation Risk           |                       |
|                                           |                                              | HQ <sub>max</sub>         | CR <sub>max</sub>     |
| 1                                         | <b><i>Benzene</i></b>                        | <b><i>4.4E+02</i></b>     | <b><i>1.2E-02</i></b> |
| 2                                         | <b><i>Dibromoethane, 1,2- (EDB)</i></b>      | <b><i>2.0E+00</i></b>     | <b><i>4.6E-03</i></b> |
| 3                                         | <b><i>Dichloroethane, 1,2- (EDC)</i></b>     | <b><i>5.5E+00</i></b>     | <b><i>2.9E-03</i></b> |
| 4                                         | <b><i>Diisopropyl ether (DIPE)</i></b>       | <b><i>2.0E+02</i></b>     | -                     |
| 5                                         | <b><i>Ethyl tert-butyl ether (ETBE)</i></b>  | <b><i>1.8E+02</i></b>     | -                     |
| 6                                         | <b><i>Tert-amyl-methyl ether (TAME)</i></b>  | <b><i>1.4E+02</i></b>     | -                     |
| 7                                         | <b><i>Xylenes (mixed isomers)</i></b>        | <b><i>4.0E+01</i></b>     | -                     |
| 8                                         | <b><i>Methyl tert-butyl ether (MTBE)</i></b> | <b><i>3.8E+01</i></b>     | -                     |
| 9                                         | <b><i>Hexane, n-</i></b>                     | <b><i>3.7E+01</i></b>     | -                     |
| 10                                        | <b><i>Tert-butyl alcohol (TBA)</i></b>       | <b><i>2.6E+01</i></b>     | -                     |
| 11                                        | <b><i>TPH - Aliphatic &gt; C05-C06</i></b>   | <b><i>1.3E+01</i></b>     | -                     |
| 12                                        | <b><i>TPH - Aliphatic &gt;C06-C08</i></b>    | <b><i>6.6E+00</i></b>     | -                     |
| 13                                        | <b><i>Toluene</i></b>                        | <b><i>3.4E+00</i></b>     | -                     |
| 14                                        | <b><i>TPH - Aliphatic &gt;C08-C10</i></b>    | <b><i>2.5E+00</i></b>     | -                     |
| 15                                        | <b><i>Ethyl benzene</i></b>                  | <b><i>1.1E+00</i></b>     | -                     |
| 16                                        | TPH - Aromatic >C10-C12                      | 4.7E-01                   | -                     |
| 17                                        | Naphthalene                                  | 4.6E-01                   | -                     |
| 18                                        | Heptane, n-                                  | 4.2E-01                   | -                     |
| 19                                        | Methyl cyclohexane                           | 4.0E-01                   | -                     |
| 20                                        | Cyclohexane                                  | 2.8E-01                   | -                     |
| 21                                        | TPH - Aliphatic >C10-C12                     | 1.1E-01                   | -                     |
| 22                                        | Trimethylbenzene, 1,2,4-                     | 1.0E-01                   | -                     |
| 23                                        | Cumene                                       | 9.9E-02                   | -                     |
| 24                                        | Trimethylbenzene, 1,3,5-                     | 4.5E-02                   | -                     |
| 25                                        | TPH - Aliphatic >C12-C16                     | 2.8E-03                   | -                     |
| 26                                        | TPH - Aromatic >C12-C16                      | 1.4E-03                   | -                     |

| Indoor Vapor Intrusion (Convection Driven) |                                              |                           |                       |
|--------------------------------------------|----------------------------------------------|---------------------------|-----------------------|
| Exposure Route:                            |                                              | Inhalation                |                       |
| Source Medium:                             |                                              | Groundwater               |                       |
| Depth to Source (m):                       |                                              | 3                         |                       |
| Note:                                      |                                              | Assumes no biodegradation |                       |
| Rank                                       | Constituent                                  | Inhalation Risk           |                       |
|                                            |                                              | HQ <sub>max</sub>         | CR <sub>max</sub>     |
| 1                                          | <b><i>Benzene</i></b>                        | <b><i>2.2E+01</i></b>     | <b><i>6.1E-04</i></b> |
| 2                                          | <b><i>Dibromoethane, 1,2- (EDB)</i></b>      | 9.9E-02                   | <b><i>2.3E-04</i></b> |
| 3                                          | <b><i>Dichloroethane, 1,2- (EDC)</i></b>     | 4.2E-01                   | <b><i>2.2E-04</i></b> |
| 4                                          | <b><i>Ethyl tert-butyl ether (ETBE)</i></b>  | <b><i>1.3E+01</i></b>     | -                     |
| 5                                          | <b><i>Diisopropyl ether (DIPE)</i></b>       | <b><i>8.8E+00</i></b>     | -                     |
| 6                                          | <b><i>Tert-amyl-methyl ether (TAME)</i></b>  | <b><i>8.7E+00</i></b>     | -                     |
| 7                                          | <b><i>Methyl tert-butyl ether (MTBE)</i></b> | <b><i>5.1E+00</i></b>     | -                     |
| 8                                          | <b><i>Hexane, n-</i></b>                     | <b><i>2.8E+00</i></b>     | -                     |
| 9                                          | <b><i>Xylenes (mixed isomers)</i></b>        | <b><i>1.8E+00</i></b>     | -                     |
| 10                                         | TPH - Aliphatic > C05-C06                    | 9.9E-01                   | -                     |
| 11                                         | Tert-butyl alcohol (TBA)                     | 4.0E-01                   | -                     |
| 12                                         | TPH - Aliphatic >C06-C08                     | 2.6E-01                   | -                     |
| 13                                         | Toluene                                      | 1.6E-01                   | -                     |
| 14                                         | TPH - Aliphatic >C08-C10                     | 1.0E-01                   | -                     |
| 15                                         | Ethyl benzene                                | 4.6E-02                   | -                     |
| 16                                         | Naphthalene                                  | 3.1E-02                   | -                     |
| 17                                         | TPH - Aromatic >C10-C12                      | 2.8E-02                   | -                     |
| 18                                         | Heptane, n-                                  | 1.3E-02                   | -                     |
| 19                                         | Methyl cyclohexane                           | 1.3E-02                   | -                     |
| 20                                         | Cyclohexane                                  | 9.7E-03                   | -                     |
| 21                                         | TPH - Aliphatic >C10-C12                     | 4.4E-03                   | -                     |
| 22                                         | Trimethylbenzene, 1,2,4-                     | 4.4E-03                   | -                     |
| 23                                         | Cumene                                       | 3.4E-03                   | -                     |
| 24                                         | Trimethylbenzene, 1,3,5-                     | 1.8E-03                   | -                     |
| 25                                         | TPH - Aliphatic >C12-C16                     | 1.1E-04                   | -                     |
| 26                                         | TPH - Aromatic >C12-C16                      | 1.1E-04                   | -                     |

Notes:

- Table presents ranking of risk-driving fuel constituents by exposure pathway.  
Constituent risk rank based on maximum degree of exceedance of either of two criteria: i) HQ<sub>max</sub> > 1.0, or ii) CR<sub>max</sub> > 1.0E-6.
- HQ<sub>max</sub> = Maximum estimated hazard quotient: Risks assume upper-end average concentration of each constituent in the fuel.
- CR<sub>max</sub> = Maximum estimated cancer risk: Risks assume upper-end average concentration of each constituent in the fuel.
- Constituents listed in bold italics are identified on Table 9 as potentially risk-driving Constituents of Potential Concern (COPCs) for the corresponding pathway.

Table S.9 (page 4 of 6)

Relative Upper-Bound Risk Due to Exposure to Fuel Constituents: Gasoline / Petrol

| Indoor Vapor Intrusion (Diffusion Driven) |                                              |                           |                       |
|-------------------------------------------|----------------------------------------------|---------------------------|-----------------------|
| Exposure Route:                           |                                              | Inhalation                |                       |
| Source Medium:                            |                                              | Groundwater               |                       |
| Depth to Source (m):                      |                                              | 3                         |                       |
| Note:                                     |                                              | Assumes no biodegradation |                       |
| Rank                                      | Constituent                                  | Inhalation Risk           |                       |
|                                           |                                              | HQ <sub>max</sub>         | CR <sub>max</sub>     |
| 1                                         | <b><i>Benzene</i></b>                        | <b><i>1.8E+01</i></b>     | <b><i>1.2E-03</i></b> |
| 2                                         | <b><i>Dibromoethane, 1,2- (EDB)</i></b>      | <b><i>2.0E-01</i></b>     | <b><i>1.1E-03</i></b> |
| 3                                         | <b><i>Dichloroethane, 1,2- (EDC)</i></b>     | <b><i>4.8E-01</i></b>     | <b><i>6.0E-04</i></b> |
| 4                                         | <b><i>Ethyl tert-butyl ether (ETBE)</i></b>  | <b><i>2.0E+01</i></b>     | -                     |
| 5                                         | <b><i>Tert-amyl-methyl ether (TAME)</i></b>  | <b><i>1.0E+01</i></b>     | -                     |
| 6                                         | <b><i>Diisopropyl ether (DIPE)</i></b>       | <b><i>7.8E+00</i></b>     | -                     |
| 7                                         | <b><i>Methyl tert-butyl ether (MTBE)</i></b> | <b><i>7.7E+00</i></b>     | -                     |
| 8                                         | <b><i>Hexane, n-</i></b>                     | <b><i>2.0E+00</i></b>     | -                     |
| 9                                         | <b><i>Xylenes (mixed isomers)</i></b>        | <b><i>1.6E+00</i></b>     | -                     |
| 10                                        | <b><i>Tert-butyl alcohol (TBA)</i></b>       | <b><i>1.0E+00</i></b>     | -                     |
| 11                                        | TPH - Aliphatic > C05-C06                    | 7.1E-01                   | -                     |
| 12                                        | TPH - Aliphatic >C06-C08                     | 1.9E-01                   | -                     |
| 13                                        | Toluene                                      | 1.3E-01                   | -                     |
| 14                                        | TPH - Aliphatic >C08-C10                     | 7.2E-02                   | -                     |
| 15                                        | Naphthalene                                  | 5.1E-02                   | -                     |
| 16                                        | Ethyl benzene                                | 3.7E-02                   | -                     |
| 17                                        | TPH - Aromatic >C10-C12                      | 2.5E-02                   | -                     |
| 18                                        | Heptane, n-                                  | 9.2E-03                   | -                     |
| 19                                        | Methyl cyclohexane                           | 9.2E-03                   | -                     |
| 20                                        | Cyclohexane                                  | 7.0E-03                   | -                     |
| 21                                        | Trimethylbenzene, 1,2,4-                     | 3.9E-03                   | -                     |
| 22                                        | TPH - Aliphatic >C10-C12                     | 3.2E-03                   | -                     |
| 23                                        | Cumene                                       | 2.6E-03                   | -                     |
| 24                                        | Trimethylbenzene, 1,3,5-                     | 1.5E-03                   | -                     |
| 25                                        | TPH - Aromatic >C12-C16                      | 1.2E-04                   | -                     |
| 26                                        | TPH - Aliphatic >C12-C16                     | 7.9E-05                   | -                     |

| Surface Soil Ingestion |                                             |                       |                       |
|------------------------|---------------------------------------------|-----------------------|-----------------------|
| Exposure Route:        |                                             | Ingestion             |                       |
| Source Medium:         |                                             | Surface Soil          |                       |
| Depth to Source (m):   |                                             | 0                     |                       |
| Rank                   | Constituent                                 | Ingestion Risk        |                       |
|                        |                                             | HQ <sub>max</sub>     | CR <sub>max</sub>     |
| 1                      | <b><i>Dibromoethane, 1,2- (EDB)</i></b>     | <b><i>6.4E-02</i></b> | <b><i>5.3E-05</i></b> |
| 2                      | <b><i>Benzene</i></b>                       | 6.7E+00               | <b><i>3.7E-05</i></b> |
| 3                      | <b><i>Diisopropyl ether (DIPE)</i></b>      | <b><i>4.2E+00</i></b> | -                     |
| 4                      | <b><i>Dichloroethane, 1,2- (EDC)</i></b>    | 4.4E-02               | <b><i>2.6E-06</i></b> |
| 5                      | <b><i>Tert-amyl-methyl ether (TAME)</i></b> | <b><i>1.7E+00</i></b> | -                     |
| 6                      | <b><i>Toluene</i></b>                       | <b><i>1.4E+00</i></b> | -                     |
| 7                      | TPH - Aliphatic >C08-C10                    | 9.6E-01               | -                     |
| 8                      | TPH - Aromatic >C10-C12                     | 8.8E-01               | -                     |
| 9                      | Ethyl tert-butyl ether (ETBE)               | 8.4E-01               | -                     |
| 10                     | Xylenes (mixed isomers)                     | 6.3E-01               | -                     |
| 11                     | Methyl naphthalene, 2-                      | 6.3E-01               | -                     |
| 12                     | Hexane, n-                                  | 5.6E-01               | -                     |
| 13                     | Methyl tert-butyl ether (MTBE)              | 5.2E-01               | -                     |
| 14                     | TPH - Aliphatic >C10-C12                    | 4.4E-01               | -                     |
| 15                     | Ethyl benzene                               | 2.4E-01               | -                     |
| 16                     | Naphthalene                                 | 1.8E-01               | -                     |
| 17                     | TPH - Aliphatic >C12-C16                    | 1.4E-01               | -                     |
| 18                     | Trimethylbenzene, 1,2,4-                    | 1.1E-01               | -                     |
| 19                     | TPH - Aliphatic >C06-C08                    | 8.8E-02               | -                     |
| 20                     | TPH - Aliphatic > C05-C06                   | 6.2E-02               | -                     |
| 21                     | TPH - Aromatic >C16-C21                     | 4.7E-02               | -                     |
| 22                     | TPH - Aromatic >C12-C16                     | 3.5E-02               | -                     |
| 23                     | Trimethylbenzene, 1,3,5-                    | 3.4E-02               | -                     |
| 24                     | Cumene                                      | 1.8E-02               | -                     |
| 25                     | Methyl naphthalene, 1-                      | 1.4E-02               | -                     |
| 26                     | Tert-butyl alcohol (TBA)                    | 1.4E-02               | -                     |
| 27                     | Heptane, n-                                 | 7.7E-03               | -                     |
| 28                     | TPH - Aliphatic >C16-C21                    | 7.0E-03               | -                     |
| 29                     | TPH - Aromatic >C21-C35                     | 4.7E-03               | -                     |
| 30                     | Methyl cyclohexane                          | 1.6E-03               | -                     |
| 31                     | Cyclohexane                                 | 1.1E-03               | -                     |

Notes:

- Table presents ranking of risk-driving fuel constituents by exposure pathway. Constituent risk rank based on maximum degree of exceedance of either of two criteria: i) HQ<sub>max</sub> > 1.0, or ii) CR<sub>max</sub> > 1.0E-6.
- HQ<sub>max</sub> = Maximum estimated hazard quotient: Risks assume upper-end average concentration of each constituent in the fuel.
- CR<sub>max</sub> = Maximum estimated cancer risk: Risks assume upper-end average concentration of each constituent in the fuel.
- Constituents listed in bold italics are identified on Table 9 as potentially risk-driving Constituents of Potential Concern (COPCs) for the corresponding pathway.

Table S.9 (page 5 of 6)

Relative Upper-Bound Risk Due to Exposure to Fuel Constituents: Gasoline / Petrol

| Surface Soil Dermal Contact |                                          |                     |                       |
|-----------------------------|------------------------------------------|---------------------|-----------------------|
| Exposure Route:             |                                          | Dermal Contact      |                       |
| Source Medium:              |                                          | Surface Soil        |                       |
| Depth to Source (m):        |                                          | 0                   |                       |
| Rank                        | Constituent                              | Dermal Contact Risk |                       |
|                             |                                          | HQ <sub>max</sub>   | CR <sub>max</sub>     |
| 1                           | <b><i>Dibromoethane, 1,2- (EDB)</i></b>  | 1.2E-02             | <b><i>5.4E-05</i></b> |
| 2                           | <b><i>Dichloroethane, 1,2- (EDC)</i></b> | 8.3E-03             | <b><i>2.6E-06</i></b> |
| 3                           | Diisopropyl ether (DIPE)                 | 8.0E-01             | -                     |
| 4                           | Tert-amyl-methyl ether (TAME)            | 3.2E-01             | -                     |
| 5                           | Ethyl tert-butyl ether (ETBE)            | 2.7E-01             | -                     |
| 6                           | Methyl tert-butyl ether (MTBE)           | 1.6E-01             | -                     |
| 7                           | Naphthalene                              | 1.4E-01             | -                     |
| 8                           | Xylenes (mixed isomers)                  | 1.2E-01             | -                     |
| 9                           | TPH - Aliphatic >C12-C16                 | 8.9E-02             | -                     |
| 10                          | TPH - Aromatic >C16-C21                  | 3.0E-02             | -                     |
| 11                          | TPH - Aromatic >C12-C16                  | 2.2E-02             | -                     |
| 12                          | TPH - Aliphatic >C16-C21                 | 4.4E-03             | -                     |
| 13                          | TPH - Aromatic >C21-C35                  | 3.0E-03             | -                     |

| Combined Surface Soil Direct Contact |                                             |                                                                  |                       |
|--------------------------------------|---------------------------------------------|------------------------------------------------------------------|-----------------------|
| Exposure Route:                      |                                             | Ingestion, Dermal Contact, Inhalation of Vapors and Particulates |                       |
| Source Medium:                       |                                             | Surface Soil                                                     |                       |
| Depth to Source (m):                 |                                             | 0                                                                |                       |
| Rank                                 | Constituent                                 | Combined Direct Contact Risk                                     |                       |
|                                      |                                             | HQ <sub>max</sub>                                                | CR <sub>max</sub>     |
| 1                                    | <b><i>Dibromoethane, 1,2- (EDB)</i></b>     | 8.2E-02                                                          | <b><i>1.2E-04</i></b> |
| 2                                    | <b><i>Benzene</i></b>                       | <b><i>6.9E+00</i></b>                                            | <b><i>4.3E-05</i></b> |
| 3                                    | <b><i>Dichloroethane, 1,2- (EDC)</i></b>    | 6.1E-02                                                          | <b><i>1.0E-05</i></b> |
| 4                                    | <b><i>Diisopropyl ether (DIPE)</i></b>      | <b><i>5.1E+00</i></b>                                            | -                     |
| 5                                    | <b><i>Tert-amyl-methyl ether (TAME)</i></b> | <b><i>2.3E+00</i></b>                                            | -                     |
| 6                                    | <b><i>Ethyl tert-butyl ether (ETBE)</i></b> | <b><i>1.6E+00</i></b>                                            | -                     |
| 7                                    | <b><i>Toluene</i></b>                       | <b><i>1.4E+00</i></b>                                            | -                     |
| 8                                    | TPH - Aliphatic >C08-C10                    | 9.6E-01                                                          | -                     |
| 9                                    | TPH - Aromatic >C10-C12                     | 8.8E-01                                                          | -                     |
| 10                                   | Xylenes (mixed isomers)                     | 8.4E-01                                                          | -                     |
| 11                                   | Methyl tert-butyl ether (MTBE)              | 7.9E-01                                                          | -                     |
| 12                                   | Methyl naphthalene, 2-                      | 6.3E-01                                                          | -                     |
| 13                                   | Hexane, n-                                  | 5.7E-01                                                          | -                     |
| 14                                   | TPH - Aliphatic >C10-C12                    | 4.4E-01                                                          | -                     |
| 15                                   | Naphthalene                                 | 3.2E-01                                                          | -                     |
| 16                                   | Ethyl benzene                               | 2.4E-01                                                          | -                     |
| 17                                   | TPH - Aliphatic >C12-C16                    | 2.3E-01                                                          | -                     |
| 18                                   | Tert-butyl alcohol (TBA)                    | 2.1E-01                                                          | -                     |
| 19                                   | Trimethylbenzene, 1,2,4-                    | 1.1E-01                                                          | -                     |
| 20                                   | TPH - Aliphatic >C06-C08                    | 9.0E-02                                                          | -                     |
| 21                                   | TPH - Aromatic >C16-C21                     | 7.6E-02                                                          | -                     |
| 22                                   | TPH - Aliphatic >C05-C06                    | 6.7E-02                                                          | -                     |
| 23                                   | TPH - Aromatic >C12-C16                     | 5.7E-02                                                          | -                     |
| 24                                   | Trimethylbenzene, 1,3,5-                    | 3.5E-02                                                          | -                     |
| 25                                   | Cumene                                      | 1.9E-02                                                          | -                     |
| 26                                   | Methyl naphthalene, 1-                      | 1.4E-02                                                          | -                     |
| 27                                   | TPH - Aliphatic >C16-C21                    | 1.1E-02                                                          | -                     |
| 28                                   | Heptane, n-                                 | 7.9E-03                                                          | -                     |
| 29                                   | TPH - Aromatic >C21-C35                     | 7.6E-03                                                          | -                     |
| 30                                   | Methyl cyclohexane                          | 1.8E-03                                                          | -                     |
| 31                                   | Cyclohexane                                 | 1.2E-03                                                          | -                     |

Notes:

- Table presents ranking of risk-driving fuel constituents by exposure pathway. Constituent risk rank based on maximum degree of exceedance of either of two criteria: i) HQ<sub>max</sub> > 1.0, or ii) CR<sub>max</sub> > 1.0E-6.
- HQ<sub>max</sub> = Maximum estimated hazard quotient: Risks assume upper-end average concentration of each constituent in the fuel.
- CR<sub>max</sub> = Maximum estimated cancer risk: Risks assume upper-end average concentration of each constituent in the fuel.
- Constituents listed in bold italics are identified on Table 9 as potentially risk-driving Constituents of Potential Concern (COPCs) for the corresponding pathway.

**Table S.9 (page 6 of 6)**

**Relative Upper-Bound Risk Due to Exposure to Fuel Constituents: Gasoline / Petrol**

| Groundwater Ingestion |                                              |                       |                       |
|-----------------------|----------------------------------------------|-----------------------|-----------------------|
| Exposure Route:       |                                              | Ingestion             |                       |
| Source Medium:        |                                              | Groundwater           |                       |
| Depth to Source (m):  |                                              | NA                    |                       |
| Rank                  | Constituent                                  | Ingestion Risk        |                       |
|                       |                                              | HQ <sub>max</sub>     | CR <sub>max</sub>     |
| 1                     | <b><i>Dibromoethane, 1,2- (EDB)</i></b>      | <b><i>6.1E+00</i></b> | <b><i>2.0E-02</i></b> |
| 2                     | <b><i>Benzene</i></b>                        | <b><i>6.8E+02</i></b> | <b><i>1.5E-02</i></b> |
| 3                     | <b><i>Dichloroethane, 1,2- (EDC)</i></b>     | <b><i>1.7E+01</i></b> | <b><i>4.1E-03</i></b> |
| 4                     | <b><i>Methyl tert-butyl ether (MTBE)</i></b> | <b><i>1.4E+03</i></b> | -                     |
| 5                     | <b><i>Diisopropyl ether (DIPE)</i></b>       | <b><i>5.0E+02</i></b> | -                     |
| 6                     | <b><i>Ethyl tert-butyl ether (ETBE)</i></b>  | <b><i>4.5E+02</i></b> | -                     |
| 7                     | <b><i>Tert-amyl-methyl ether (TAME)</i></b>  | <b><i>2.0E+02</i></b> | -                     |
| 8                     | <b><i>Tert-butyl alcohol (TBA)</i></b>       | <b><i>1.5E+02</i></b> | -                     |
| 9                     | <b><i>Toluene</i></b>                        | <b><i>3.7E+01</i></b> | -                     |
| 10                    | <b><i>Xylenes (mixed isomers)</i></b>        | <b><i>4.7E+00</i></b> | -                     |
| 11                    | <b><i>Ethyl benzene</i></b>                  | <b><i>1.7E+00</i></b> | -                     |
| 12                    | TPH - Aromatic >C10-C12                      | 7.7E-01               | -                     |
| 13                    | Methyl naphthalene, 2-                       | 5.1E-01               | -                     |
| 14                    | Hexane, n-                                   | 3.9E-01               | -                     |
| 15                    | Trimethylbenzene, 1,2,4-                     | 2.3E-01               | -                     |
| 16                    | Naphthalene                                  | 1.9E-01               | -                     |
| 17                    | TPH - Aliphatic > C05-C06                    | 1.3E-01               | -                     |
| 18                    | Trimethylbenzene, 1,3,5-                     | 6.7E-02               | -                     |
| 19                    | Cumene                                       | 3.5E-02               | -                     |
| 20                    | TPH - Aliphatic >C06-C08                     | 2.2E-02               | -                     |
| 21                    | TPH - Aliphatic >C08-C10                     | 1.4E-02               | -                     |
| 22                    | Methyl naphthalene, 1-                       | 1.3E-02               | -                     |
| 23                    | TPH - Aromatic >C12-C16                      | 6.2E-03               | -                     |
| 24                    | Cyclohexane                                  | 2.5E-03               | -                     |
| 25                    | Heptane, n-                                  | 9.3E-04               | -                     |
| 26                    | Methyl cyclohexane                           | 7.9E-04               | -                     |
| 27                    | TPH - Aromatic >C16-C21                      | 7.3E-04               | -                     |
| 28                    | TPH - Aliphatic >C10-C12                     | 4.2E-04               | -                     |
| 29                    | TPH - Aliphatic >C12-C16                     | 2.4E-06               | -                     |
| 30                    | TPH - Aromatic >C21-C35                      | 5.9E-07               | -                     |
| 31                    | TPH - Aliphatic >C16-C21                     | 3.0E-10               | -                     |

Notes:

1. Table presents ranking of risk-driving fuel constituents by exposure pathway.  
Constituent risk rank based on maximum degree of exceedance of either of two criteria: i) HQ<sub>max</sub> > 1.0, or ii) CR<sub>max</sub> > 1.0E-6.
2. HQ<sub>max</sub> = Maximum estimated hazard quotient: Risks assume upper-end average concentration of each constituent in the fuel.
3. CR<sub>max</sub> = Maximum estimated cancer risk: Risks assume upper-end average concentration of each constituent in the fuel.
4. Constituents listed in bold italics are identified on Table 9 as potentially risk-driving Constituents of Potential Concern (COPCs) for the corresponding pathway.

Table S.10 (page 1 of 6)

Relative Upper-Bound Risk Due to Exposure to Fuel Constituents: Diesel / Fuel Oil

| Direct NAPL Intrusion to Enclosed Space           |                                    |                 |                |
|---------------------------------------------------|------------------------------------|-----------------|----------------|
| Exposure Route:                                   |                                    | Inhalation      |                |
| Source Medium:                                    |                                    | NAPL            |                |
| Depth to Source (m):                              |                                    | 0               |                |
| Note: Saturated vapor, diluted in breathing space |                                    |                 |                |
| Rank                                              | Constituent                        | Inhalation Risk |                |
|                                                   |                                    | HQmax           | CRmax          |
| 1                                                 | <b>Benzene</b>                     | <b>1.2E+02</b>  | <b>3.3E-03</b> |
| 2                                                 | <b>Xylenes (mixed isomers)</b>     | <b>1.0E+01</b>  | -              |
| 3                                                 | <b>TPH - Aromatic &gt;C10-C12</b>  | <b>5.9E+00</b>  | -              |
| 4                                                 | <b>Naphthalene</b>                 | <b>3.9E+00</b>  | -              |
| 5                                                 | <b>TPH - Aliphatic &gt;C08-C10</b> | <b>2.9E+00</b>  | -              |
| 6                                                 | <b>TPH - Aliphatic &gt;C10-C12</b> | <b>1.1E+00</b>  | -              |
| 7                                                 | Toluene                            | 7.1E-01         | -              |
| 8                                                 | TPH - Aromatic >C12-C16            | 6.5E-01         | -              |
| 9                                                 | Ethyl benzene                      | 5.4E-01         | -              |
| 10                                                | TPH - Aliphatic >C12-C16           | 5.0E-01         | -              |
| 11                                                | Biphenyl, 1,1-                     | 2.4E-01         | -              |
| 12                                                | TPH - Aliphatic >C06-C08           | 1.4E-01         | -              |
| 13                                                | Trimethylbenzene, 1,3,5-           | 9.9E-02         | -              |
| 14                                                | Cumene                             | 2.4E-02         | -              |
| 15                                                | Benzo-a-pyrene                     | 2.2E-06         | 2.1E-11        |
| 16                                                | Benzo-b-fluoranthene               | -               | 6.4E-13        |
| 17                                                | Benzo-a-anthracene                 | -               | 2.5E-13        |
| 18                                                | Chrysene                           | -               | 1.7E-14        |
| 19                                                | Indeno-1,2,3-cd-pyrene             | -               | 6.2E-17        |

| Outdoor Inhalation - Vapors and Particulates |                          |                 |         |
|----------------------------------------------|--------------------------|-----------------|---------|
| Exposure Route:                              |                          | Inhalation      |         |
| Source Medium:                               |                          | Surface Soil    |         |
| Depth to Source (m):                         |                          | 0               |         |
| Rank                                         | Constituent              | Inhalation Risk |         |
|                                              |                          | HQmax           | CRmax   |
| 1                                            | Benzene                  | 1.9E-02         | 5.4E-07 |
| 2                                            | Naphthalene              | 9.3E-03         | -       |
| 3                                            | TPH - Aromatic >C10-C12  | 7.8E-03         | -       |
| 4                                            | Xylenes (mixed isomers)  | 6.6E-03         | -       |
| 5                                            | TPH - Aromatic >C12-C16  | 2.0E-03         | -       |
| 6                                            | Biphenyl, 1,1-           | 1.2E-03         | -       |
| 7                                            | TPH - Aliphatic >C08-C10 | 5.8E-04         | -       |
| 8                                            | TPH - Aliphatic >C10-C12 | 5.1E-04         | -       |
| 9                                            | TPH - Aliphatic >C12-C16 | 4.8E-04         | -       |
| 10                                           | Toluene                  | 1.7E-04         | -       |
| 11                                           | Ethyl benzene            | 1.6E-04         | -       |
| 12                                           | Benzo-a-pyrene           | 1.0E-05         | 9.4E-11 |
| 13                                           | Trimethylbenzene, 1,3,5- | 4.8E-05         | -       |
| 14                                           | Cumene                   | 1.5E-05         | -       |
| 15                                           | TPH - Aliphatic >C06-C08 | 1.3E-05         | -       |
| 16                                           | Benzo-a-anthracene       | -               | 1.4E-13 |
| 17                                           | Benzo-b-fluoranthene     | -               | 7.3E-14 |
| 18                                           | Indeno-1,2,3-cd-pyrene   | -               | 1.2E-14 |
| 19                                           | Chrysene                 | -               | 1.5E-15 |

Notes:

1. Table presents ranking of risk-driving fuel constituents by exposure pathway.  
Constituent risk rank based on maximum degree of exceedance of either of two criteria: i) HQmax > 1.0, or ii) CRmax > 1.0E-6.
2. HQmax = Maximum estimated hazard quotient: Risks assume upper-end average concentration of each constituent in the fuel.
3. CRmax = Maximum estimated cancer risk: Risks assume upper-end average concentration of each constituent in the fuel.
4. Constituents listed in bold italics are identified on Table 9 as potentially risk-driving Constituents of Potential Concern (COPCs) for the corresponding pathway.



Table S.10 (page 2 of 6)

Relative Upper-Bound Risk Due to Exposure to Fuel Constituents: Diesel / Fuel Oil

| Outdoor Inhalation - Vapors |                          |                 |         |
|-----------------------------|--------------------------|-----------------|---------|
| Exposure Route:             |                          | Inhalation      |         |
| Source Medium:              |                          | Groundwater     |         |
| Depth to Source (m):        |                          | 3               |         |
| Rank                        | Constituent              | Inhalation Risk |         |
|                             |                          | HQmax           | CRmax   |
| 1                           | Benzene                  | 9.3E-03         | 2.6E-07 |
| 2                           | Xylenes (mixed isomers)  | 7.2E-04         | -       |
| 3                           | Naphthalene              | 7.2E-04         | -       |
| 4                           | TPH - Aromatic >C10-C12  | 6.1E-04         | -       |
| 5                           | TPH - Aliphatic >C08-C10 | 1.6E-04         | -       |
| 6                           | TPH - Aromatic >C12-C16  | 1.1E-04         | -       |
| 7                           | TPH - Aliphatic >C10-C12 | 6.2E-05         | -       |
| 8                           | Biphenyl, 1,1-           | 5.1E-05         | -       |
| 9                           | Toluene                  | 5.0E-05         | -       |
| 10                          | Ethyl benzene            | 3.2E-05         | -       |
| 11                          | TPH - Aliphatic >C12-C16 | 2.7E-05         | -       |
| 12                          | TPH - Aliphatic >C06-C08 | 7.6E-06         | -       |
| 13                          | Trimethylbenzene, 1,3,5- | 5.3E-06         | -       |
| 14                          | Cumene                   | 1.1E-06         | -       |
| 15                          | Benzo-a-pyrene           | 7.9E-10         | 7.3E-15 |
| 16                          | Benzo-a-anthracene       | -               | 8.4E-17 |
| 17                          | Benzo-b-fluoranthene     | -               | 7.9E-17 |
| 18                          | Chrysene                 | -               | 2.4E-18 |
| 19                          | Indeno-1,2,3-cd-pyrene   | -               | 9.7E-21 |

| Indoor Vapor Intrusion (Convection Driven) |                          |                 |                |
|--------------------------------------------|--------------------------|-----------------|----------------|
| Exposure Route:                            |                          | Inhalation      |                |
| Source Medium:                             |                          | Subsurface Soil |                |
| Depth to Source (m):                       |                          | 0.15            |                |
| Note: Assumes no biodegradation            |                          |                 |                |
| Rank                                       | Constituent              | Inhalation Risk |                |
|                                            |                          | HQmax           | CRmax          |
| 1                                          | <b>Benzene</b>           | <b>4.4E+00</b>  | <b>1.3E-04</b> |
| 2                                          | Xylenes (mixed isomers)  | 3.2E-01         | -              |
| 3                                          | TPH - Aromatic >C10-C12  | 2.5E-01         | -              |
| 4                                          | TPH - Aliphatic >C08-C10 | 1.2E-01         | -              |
| 5                                          | Naphthalene              | 9.8E-02         | -              |
| 6                                          | TPH - Aliphatic >C10-C12 | 4.8E-02         | -              |
| 7                                          | TPH - Aromatic >C12-C16  | 2.8E-02         | -              |
| 8                                          | Toluene                  | 2.7E-02         | -              |
| 9                                          | TPH - Aliphatic >C12-C16 | 2.1E-02         | -              |
| 10                                         | Ethyl benzene            | 1.7E-02         | -              |
| 11                                         | Biphenyl, 1,1-           | 5.9E-03         | -              |
| 12                                         | TPH - Aliphatic >C06-C08 | 5.9E-03         | -              |
| 13                                         | Trimethylbenzene, 1,3,5- | 2.6E-03         | -              |
| 14                                         | Cumene                   | 6.8E-04         | -              |
| 15                                         | Benzo-a-pyrene           | 5.5E-08         | 5.1E-13        |
| 16                                         | Benzo-b-fluoranthene     | -               | 6.2E-15        |
| 17                                         | Benzo-a-anthracene       | -               | 5.9E-15        |
| 18                                         | Chrysene                 | -               | 1.9E-16        |
| 19                                         | Indeno-1,2,3-cd-pyrene   | -               | 6.8E-19        |

Notes:

- Table presents ranking of risk-driving fuel constituents by exposure pathway.  
Constituent risk rank based on maximum degree of exceedance of either of two criteria: i) HQmax > 1.0, or ii) CRmax > 1.0E-6.
- HQmax = Maximum estimated hazard quotient: Risks assume upper-end average concentration of each constituent in the fuel.
- CRmax = Maximum estimated cancer risk: Risks assume upper-end average concentration of each constituent in the fuel.
- Constituents listed in bold italics are identified on Table 9 as potentially risk-driving Constituents of Potential Concern (COPCs) for the corresponding pathway.

Table S.10 (page 3 of 6)

Relative Upper-Bound Risk Due to Exposure to Fuel Constituents: Diesel / Fuel Oil

| Indoor Vapor Intrusion (Diffusion Driven) |                                   |                 |                |
|-------------------------------------------|-----------------------------------|-----------------|----------------|
| Exposure Route:                           |                                   | Inhalation      |                |
| Source Medium:                            |                                   | Subsurface Soil |                |
| Depth to Source (m):                      |                                   | 0.15            |                |
| Note: Assumes no biodegradation           |                                   |                 |                |
| Rank                                      | Constituent                       | Inhalation Risk |                |
|                                           |                                   | HQmax           | CRmax          |
| 1                                         | <b>Benzene</b>                    | <b>3.3E+01</b>  | <b>9.4E-04</b> |
| 2                                         | <b>Xylenes (mixed isomers)</b>    | <b>3.2E+00</b>  | -              |
| 3                                         | <b>TPH - Aromatic &gt;C10-C12</b> | <b>2.0E+00</b>  | -              |
| 4                                         | <b>Naphthalene</b>                | <b>1.1E+00</b>  | -              |
| 5                                         | TPH - Aliphatic >C08-C10          | 9.9E-01         | -              |
| 6                                         | TPH - Aliphatic >C10-C12          | 3.8E-01         | -              |
| 7                                         | Toluene                           | 2.3E-01         | -              |
| 8                                         | TPH - Aromatic >C12-C16           | 2.2E-01         | -              |
| 9                                         | TPH - Aliphatic >C12-C16          | 1.7E-01         | -              |
| 10                                        | Ethyl benzene                     | 1.7E-01         | -              |
| 11                                        | Biphenyl, 1,1-                    | 6.7E-02         | -              |
| 12                                        | TPH - Aliphatic >C06-C08          | 4.7E-02         | -              |
| 13                                        | Trimethylbenzene, 1,3,5-          | 2.9E-02         | -              |
| 14                                        | Cumene                            | 7.2E-03         | -              |
| 15                                        | Benzo-a-pyrene                    | 6.2E-07         | 5.7E-12        |
| 16                                        | Benzo-b-fluoranthene              | -               | 1.1E-13        |
| 17                                        | Benz-a-anthracene                 | -               | 6.8E-14        |
| 18                                        | Chrysene                          | -               | 3.1E-15        |
| 19                                        | Indeno-1,2,3-cd-pyrene            | -               | 1.1E-17        |

| Indoor Vapor Intrusion (Convection Driven) |                          |                 |                |
|--------------------------------------------|--------------------------|-----------------|----------------|
| Exposure Route:                            |                          | Inhalation      |                |
| Source Medium:                             |                          | Groundwater     |                |
| Depth to Source (m):                       |                          | 3               |                |
| Note: Assumes no biodegradation            |                          |                 |                |
| Rank                                       | Constituent              | Inhalation Risk |                |
|                                            |                          | HQmax           | CRmax          |
| 1                                          | <b>Benzene</b>           | <b>1.9E+00</b>  | <b>5.4E-05</b> |
| 2                                          | Xylenes (mixed isomers)  | 1.4E-01         | -              |
| 3                                          | TPH - Aromatic >C10-C12  | 1.2E-01         | -              |
| 4                                          | Naphthalene              | 7.2E-02         | -              |
| 5                                          | TPH - Aliphatic >C08-C10 | 3.9E-02         | -              |
| 6                                          | TPH - Aromatic >C12-C16  | 1.7E-02         | -              |
| 7                                          | TPH - Aliphatic >C10-C12 | 1.5E-02         | -              |
| 8                                          | Toluene                  | 1.1E-02         | -              |
| 9                                          | Ethyl benzene            | 6.9E-03         | -              |
| 10                                         | TPH - Aliphatic >C12-C16 | 6.8E-03         | -              |
| 11                                         | Biphenyl, 1,1-           | 4.6E-03         | -              |
| 12                                         | TPH - Aliphatic >C06-C08 | 1.9E-03         | -              |
| 13                                         | Trimethylbenzene, 1,3,5- | 1.1E-03         | -              |
| 14                                         | Cumene                   | 2.5E-04         | -              |
| 15                                         | Benzo-a-pyrene           | 4.7E-08         | 4.3E-13        |
| 16                                         | Benzo-b-fluoranthene     | -               | 5.2E-15        |
| 17                                         | Benz-a-anthracene        | -               | 5.0E-15        |
| 18                                         | Chrysene                 | -               | 1.6E-16        |
| 19                                         | Indeno-1,2,3-cd-pyrene   | -               | 5.8E-19        |

Notes:

1. Table presents ranking of risk-driving fuel constituents by exposure pathway.  
Constituent risk rank based on maximum degree of exceedance of either of two criteria: i) HQmax > 1.0, or ii) CRmax > 1.0E-5.
2. HQmax = Maximum estimated hazard quotient: Risks assume upper-end average concentration of each constituent in the fuel.
3. CRmax = Maximum estimated cancer risk: Risks assume upper-end average concentration of each constituent in the fuel.
4. Constituents listed in bold italics are identified on Table 9 as potentially risk-driving Constituents of Potential Concern (COPCs) for the corresponding pathway.

Table S.10 (page 4 of 6)

Relative Upper-Bound Risk Due to Exposure to Fuel Constituents: Diesel / Fuel Oil

| Indoor Vapor Intrusion (Diffusion Driven) |                          |                 |                |
|-------------------------------------------|--------------------------|-----------------|----------------|
| Exposure Route:                           |                          | Inhalation      |                |
| Source Medium:                            |                          | Groundwater     |                |
| Depth to Source (m):                      |                          | 3               |                |
| Note: Assumes no biodegradation           |                          |                 |                |
| Rank                                      | Constituent              | Inhalation Risk |                |
|                                           |                          | HQmax           | CRmax          |
| 1                                         | <b>Benzene</b>           | <b>1.6E+00</b>  | <b>1.1E-04</b> |
| 2                                         | Xylenes (mixed isomers)  | 1.3E-01         | -              |
| 3                                         | Naphthalene              | 1.2E-01         | -              |
| 4                                         | TPH - Aromatic >C10-C12  | 1.1E-01         | -              |
| 5                                         | TPH - Aliphatic >C08-C10 | 2.8E-02         | -              |
| 6                                         | TPH - Aromatic >C12-C16  | 1.9E-02         | -              |
| 7                                         | TPH - Aliphatic >C10-C12 | 1.1E-02         | -              |
| 8                                         | Toluene                  | 8.8E-03         | -              |
| 9                                         | Biphenyl, 1,1-           | 8.5E-03         | -              |
| 10                                        | Ethyl benzene            | 5.6E-03         | -              |
| 11                                        | TPH - Aliphatic >C12-C16 | 4.8E-03         | -              |
| 12                                        | TPH - Aliphatic >C06-C08 | 1.3E-03         | -              |
| 13                                        | Trimethylbenzene, 1,3,5- | 9.3E-04         | -              |
| 14                                        | Cumene                   | 1.9E-04         | -              |
| 15                                        | Benzo-a-pyrene           | 1.3E-07         | 2.7E-12        |
| 16                                        | Benzo-b-fluoranthene     | -               | 3.2E-14        |
| 17                                        | Benz-a-anthracene        | -               | 3.2E-14        |
| 18                                        | Chrysene                 | -               | 9.7E-16        |
| 19                                        | Indeno-1,2,3-cd-pyrene   | -               | 3.9E-18        |

| Surface Soil Ingestion |                                    |                |                |
|------------------------|------------------------------------|----------------|----------------|
| Exposure Route:        |                                    | Ingestion      |                |
| Source Medium:         |                                    | Surface Soil   |                |
| Depth to Source (m):   |                                    | 0              |                |
| Rank                   | Constituent                        | Ingestion Risk |                |
|                        |                                    | HQmax          | CRmax          |
| 1                      | <b>TPH - Aliphatic &gt;C12-C16</b> | <b>5.0E+00</b> | -              |
| 2                      | <b>Methyl naphthalene, 2-</b>      | <b>4.9E+00</b> | -              |
| 3                      | <b>TPH - Aromatic &gt;C12-C16</b>  | <b>3.2E+00</b> | -              |
| 4                      | <b>TPH - Aromatic &gt;C10-C12</b>  | <b>2.2E+00</b> | -              |
| 5                      | <b>Benzene</b>                     | <b>3.4E-01</b> | <b>1.9E-06</b> |
| 6                      | <b>Benzo-a-pyrene</b>              | 7.3E-03        | <b>1.2E-06</b> |
| 7                      | TPH - Aliphatic >C10-C12           | 8.7E-01        | -              |
| 8                      | TPH - Aliphatic >C16-C21           | 3.4E-01        | -              |
| 9                      | Naphthalene                        | 2.4E-01        | -              |
| 10                     | TPH - Aliphatic >C08-C10           | 2.2E-01        | -              |
| 11                     | Methyl naphthalene, 1-             | 1.5E-01        | -              |
| 12                     | Toluene                            | 5.7E-02        | -              |
| 13                     | Phenanthrene                       | 4.5E-02        | -              |
| 14                     | Fluorene                           | 3.7E-02        | -              |
| 15                     | Xylenes (mixed isomers)            | 2.9E-02        | -              |
| 16                     | Ethyl benzene                      | 2.1E-02        | -              |
| 17                     | Biphenyl, 1,1-                     | 2.0E-02        | -              |
| 18                     | TPH - Aromatic >C16-C21            | 1.4E-02        | -              |
| 19                     | Trimethylbenzene, 1,3,5-           | 1.3E-02        | -              |
| 20                     | Fluoranthene                       | 2.7E-03        | 9.8E-09        |
| 21                     | Pyrene                             | 3.1E-03        | -              |
| 22                     | Benz-a-anthracene                  | 4.6E-04        | 2.1E-09        |
| 23                     | Benzo-b-fluoranthene               | 2.5E-04        | 1.1E-09        |
| 24                     | Cumene                             | 7.6E-04        | -              |
| 25                     | Indeno-1,2,3-cd-pyrene             | 1.2E-04        | 5.7E-10        |
| 26                     | Anthracene                         | 4.1E-04        | -              |
| 27                     | TPH - Aliphatic >C06-C08           | 3.6E-04        | -              |
| 28                     | Chrysene                           | 6.7E-05        | 3.1E-10        |
| 29                     | TPH - Aromatic >C21-C35            | 2.3E-04        | -              |
| 30                     | Benzo-e-pyrene                     | 3.0E-05        | -              |
| 31                     | Benzo-g,h,i-perylene               | 1.1E-05        | -              |

Notes:

- Table presents ranking of risk-driving fuel constituents by exposure pathway. Constituent risk rank based on maximum degree of exceedance of either of two criteria: i) HQmax > 1.0, or ii) CRmax > 1.0E-6.
- HQmax = Maximum estimated hazard quotient: Risks assume upper-end average concentration of each constituent in the fuel.
- CRmax = Maximum estimated cancer risk: Risks assume upper-end average concentration of each constituent in the fuel.
- Constituents listed in bold italics are identified on Table 9 as potentially risk-driving Constituents of Potential Concern (COPCs) for the corresponding pathway.

Table S.10 (page 5 of 6)

Relative Upper-Bound Risk Due to Exposure to Fuel Constituents: Diesel / Fuel Oil

| Surface Soil Dermal Contact |                                           |                       |                       |
|-----------------------------|-------------------------------------------|-----------------------|-----------------------|
| Exposure Route:             |                                           | Dermal Contact        |                       |
| Source Medium:              |                                           | Surface Soil          |                       |
| Depth to Source (m):        |                                           | 0                     |                       |
| Rank                        | Constituent                               | Dermal Contact Risk   |                       |
|                             |                                           | HQmax                 | CRmax                 |
| 1                           | <b><i>Benzo-a-pyrene</i></b>              | 6.0E-03               | <b><i>5.5E-06</i></b> |
| 2                           | <b><i>TPH - Aliphatic &gt;C12-C16</i></b> | <b><i>3.1E+00</i></b> | -                     |
| 3                           | <b><i>TPH - Aromatic &gt;C12-C16</i></b>  | <b><i>2.0E+00</i></b> | -                     |
| 4                           | TPH - Aliphatic >C16-C21                  | 2.1E-01               | -                     |
| 5                           | Naphthalene                               | 2.0E-01               | -                     |
| 6                           | Fluoranthene                              | 2.2E-03               | 4.3E-08               |
| 7                           | Phenanthrene                              | 3.7E-02               | -                     |
| 8                           | Fluorene                                  | 3.0E-02               | -                     |
| 9                           | Biphenyl, 1,1-                            | 2.6E-02               | -                     |
| 10                          | Benz-a-anthracene                         | 3.7E-04               | 9.3E-09               |
| 11                          | TPH - Aromatic >C16-C21                   | 9.1E-03               | -                     |
| 12                          | Xylenes (mixed isomers)                   | 5.5E-03               | -                     |
| 13                          | Benzo-b-fluoranthene                      | 2.0E-04               | 5.0E-09               |
| 14                          | Pyrene                                    | 2.6E-03               | -                     |
| 15                          | Chrysene                                  | 5.5E-05               | 1.4E-09               |
| 16                          | Anthracene                                | 3.3E-04               | -                     |
| 17                          | Indeno-1,2,3-cd-pyrene                    | 9.2E-06               | 2.3E-10               |
| 18                          | TPH - Aromatic >C21-C35                   | 1.5E-04               | -                     |
| 19                          | Benzo-e-pyrene                            | 2.8E-05               | -                     |
| 20                          | Benzo-g,h,i-perylene                      | 9.2E-06               | -                     |

| Combined Surface Soil Direct Contact |                                           |                                                                  |                       |
|--------------------------------------|-------------------------------------------|------------------------------------------------------------------|-----------------------|
| Exposure Route:                      |                                           | Ingestion, Dermal Contact, Inhalation of Vapors and Particulates |                       |
| Source Medium:                       |                                           | Surface Soil                                                     |                       |
| Depth to Source (m):                 |                                           | 0                                                                |                       |
| Rank                                 | Constituent                               | Combined Direct Contact Risk                                     |                       |
|                                      |                                           | HQmax                                                            | CRmax                 |
| 1                                    | <b><i>TPH - Aliphatic &gt;C12-C16</i></b> | <b><i>8.1E+00</i></b>                                            | -                     |
| 2                                    | <b><i>Benzo-a-pyrene</i></b>              | 1.3E-02                                                          | <b><i>6.7E-06</i></b> |
| 3                                    | <b><i>TPH - Aromatic &gt;C12-C16</i></b>  | <b><i>5.1E+00</i></b>                                            | -                     |
| 4                                    | <b><i>Methyl naphthalene, 2-</i></b>      | <b><i>4.9E+00</i></b>                                            | -                     |
| 5                                    | <b><i>Benzene</i></b>                     | 3.6E-01                                                          | <b><i>2.4E-06</i></b> |
| 6                                    | <b><i>TPH - Aromatic &gt;C10-C12</i></b>  | <b><i>2.2E+00</i></b>                                            | -                     |
| 7                                    | TPH - Aliphatic >C10-C12                  | 8.7E-01                                                          | -                     |
| 8                                    | TPH - Aliphatic >C16-C21                  | 5.6E-01                                                          | -                     |
| 9                                    | Naphthalene                               | 4.4E-01                                                          | -                     |
| 10                                   | TPH - Aliphatic >C08-C10                  | 2.2E-01                                                          | -                     |
| 11                                   | Methyl naphthalene, 1-                    | 1.5E-01                                                          | -                     |
| 12                                   | Phenanthrene                              | 8.1E-02                                                          | -                     |
| 13                                   | Fluorene                                  | 6.7E-02                                                          | -                     |
| 14                                   | Toluene                                   | 5.7E-02                                                          | -                     |
| 15                                   | Fluoranthene                              | 4.8E-03                                                          | 5.3E-08               |
| 16                                   | Biphenyl, 1,1-                            | 4.7E-02                                                          | -                     |
| 17                                   | Xylenes (mixed isomers)                   | 4.1E-02                                                          | -                     |
| 18                                   | TPH - Aromatic >C16-C21                   | 2.4E-02                                                          | -                     |
| 19                                   | Ethyl benzene                             | 2.1E-02                                                          | -                     |
| 20                                   | Trimethylbenzene, 1,3,5-                  | 1.3E-02                                                          | -                     |
| 21                                   | Benz-a-anthracene                         | 8.3E-04                                                          | 1.1E-08               |
| 22                                   | Benzo-b-fluoranthene                      | 4.5E-04                                                          | 6.2E-09               |
| 23                                   | Pyrene                                    | 5.7E-03                                                          | -                     |
| 24                                   | Chrysene                                  | 1.2E-04                                                          | 1.7E-09               |
| 25                                   | Indeno-1,2,3-cd-pyrene                    | 1.3E-04                                                          | 8.0E-10               |
| 26                                   | Cumene                                    | 7.8E-04                                                          | -                     |
| 27                                   | Anthracene                                | 7.4E-04                                                          | -                     |
| 28                                   | TPH - Aromatic >C21-C35                   | 3.8E-04                                                          | -                     |
| 29                                   | TPH - Aliphatic >C06-C08                  | 3.8E-04                                                          | -                     |
| 30                                   | Benzo-e-pyrene                            | 5.8E-05                                                          | -                     |
| 31                                   | Benzo-g,h,i-perylene                      | 2.0E-05                                                          | -                     |

Notes:

- Table presents ranking of risk-driving fuel constituents by exposure pathway.  
Constituent risk rank based on maximum degree of exceedance of either of two criteria: i) HQmax > 1.0, or ii) CRmax > 1.0E-6.
- HQmax = Maximum estimated hazard quotient: Risks assume upper-end average concentration of each constituent in the fuel.
- CRmax = Maximum estimated cancer risk: Risks assume upper-end average concentration of each constituent in the fuel.
- Constituents listed in bold italics are identified on Table 9 as potentially risk-driving Constituents of Potential Concern (COPCs) for the corresponding pathway.

**Table S.10 (page 6 of 6)**

**Relative Upper-Bound Risk Due to Exposure to Fuel Constituents: Diesel / Fuel Oil**

| Groundwater Ingestion |                                   |                |                |
|-----------------------|-----------------------------------|----------------|----------------|
| Exposure Route:       |                                   | Ingestion      |                |
| Source Medium:        |                                   | Groundwater    |                |
| Depth to Source (m):  |                                   | NA             |                |
| Rank                  | Constituent                       | Ingestion Risk |                |
|                       |                                   | HQmax          | CRmax          |
| 1                     | <b>Benzene</b>                    | <b>6.0E+01</b> | <b>1.3E-03</b> |
| 2                     | <b>Methyl naphthalene, 2-</b>     | <b>6.8E+00</b> | -              |
| 3                     | <b>TPH - Aromatic &gt;C10-C12</b> | <b>3.3E+00</b> | -              |
| 4                     | <b>Toluene</b>                    | <b>2.5E+00</b> | -              |
| 5                     | TPH - Aromatic >C12-C16           | 9.6E-01        | -              |
| 6                     | Naphthalene                       | 4.6E-01        | -              |
| 7                     | Xylenes (mixed isomers)           | 3.8E-01        | -              |
| 8                     | Ethyl benzene                     | 2.6E-01        | -              |
| 9                     | Methyl naphthalene, 1-            | 2.4E-01        | -              |
| 10                    | Trimethylbenzene, 1,3,5-          | 4.3E-02        | -              |
| 11                    | Biphenyl, 1,1-                    | 7.8E-03        | -              |
| 12                    | TPH - Aliphatic >C08-C10          | 5.6E-03        | -              |
| 13                    | Fluorene                          | 3.4E-03        | -              |
| 14                    | Cumene                            | 2.5E-03        | -              |
| 15                    | Phenanthrene                      | 1.6E-03        | -              |
| 16                    | TPH - Aliphatic >C10-C12          | 1.5E-03        | -              |
| 17                    | TPH - Aromatic >C16-C21           | 3.9E-04        | -              |
| 18                    | Fluoranthene                      | 2.1E-05        | 3.1E-10        |
| 19                    | Benzo-a-pyrene                    | 3.7E-07        | 2.5E-10        |
| 20                    | TPH - Aliphatic >C06-C08          | 1.5E-04        | -              |
| 21                    | TPH - Aliphatic >C12-C16          | 1.5E-04        | -              |
| 22                    | Pyrene                            | 1.7E-05        | -              |
| 23                    | Benzo-a-anthracene                | 1.5E-07        | 2.7E-12        |
| 24                    | Anthracene                        | 7.8E-07        | -              |
| 25                    | Benzo-b-fluoranthene              | 1.2E-08        | 2.1E-13        |
| 26                    | Chrysene                          | 3.7E-09        | 6.8E-14        |
| 27                    | TPH - Aromatic >C21-C35           | 5.0E-08        | -              |
| 28                    | TPH - Aliphatic >C16-C21          | 2.5E-08        | -              |
| 29                    | Indeno-1,2,3-cd-pyrene            | 7.8E-11        | 1.4E-15        |
| 30                    | Benzo-e-pyrene                    | 8.1E-10        | -              |
| 31                    | Benzo-g,h,i-perylene              | 8.3E-11        | -              |

Notes:

- Table presents ranking of risk-driving fuel constituents by exposure pathway.  
Constituent risk rank based on maximum degree of exceedance of either of two criteria: i) HQmax > 1.0, or ii) CRmax > 1.0E-6.
- HQmax = Maximum estimated hazard quotient: Risks assume upper-end average concentration of each constituent in the fuel.
- CRmax = Maximum estimated cancer risk: Risks assume upper-end average concentration of each constituent in the fuel.
- Constituents listed in bold italics are identified on Table 9 as potentially risk-driving Constituents of Potential Concern (COPCs) for the corresponding pathway.

Table S.11 (page 1 of 6)

Relative Upper-Bound Risk Due to Exposure to Fuel Constituents: Kerosene / Jet Fuel

| Direct NAPL Intrusion to Enclosed Space           |                                    |                 |               |
|---------------------------------------------------|------------------------------------|-----------------|---------------|
| Exposure Route:                                   |                                    | Inhalation      |               |
| Source Medium:                                    |                                    | NAPL            |               |
| Depth to Source (m):                              |                                    | 0               |               |
| Note: Saturated vapor, diluted in breathing space |                                    |                 |               |
| Rank                                              | Constituent                        | Inhalation Risk |               |
|                                                   |                                    | HQmax           | CRmax         |
| 1                                                 | <b>Benzene</b>                     | <b>5.9E+2</b>   | <b>1.7E-2</b> |
| 2                                                 | <b>Xylenes (mixed isomers)</b>     | <b>6.2E+1</b>   | -             |
| 3                                                 | <b>TPH - Aliphatic &gt;C08-C10</b> | <b>5.2E+1</b>   | -             |
| 4                                                 | <b>TPH - Aliphatic &gt;C05-C06</b> | <b>2.1E+1</b>   | -             |
| 5                                                 | <b>TPH - Aliphatic &gt;C06-C08</b> | <b>1.7E+1</b>   | -             |
| 6                                                 | <b>TPH - Aromatic &gt;C10-C12</b>  | <b>5.6E+0</b>   | -             |
| 7                                                 | <b>TPH - Aliphatic &gt;C10-C12</b> | <b>5.4E+0</b>   | -             |
| 8                                                 | <b>Toluene</b>                     | <b>3.5E+0</b>   | -             |
| 9                                                 | <b>Naphthalene</b>                 | <b>3.5E+0</b>   | -             |
| 10                                                | <b>Ethyl benzene</b>               | <b>2.5E+0</b>   | -             |
| 11                                                | n-Heptane                          | <b>1.6E+0</b>   | -             |
| 12                                                | TPH - Aromatic >C12-C16            | 8.2E-1          | -             |
| 13                                                | Trimethylbenzene, 1,3,5-           | 5.4E-1          | -             |
| 14                                                | TPH - Aliphatic >C12-C16           | 3.5E-1          | -             |

| Outdoor Inhalation - Vapors and Particulates |                          |                 |               |
|----------------------------------------------|--------------------------|-----------------|---------------|
| Exposure Route:                              |                          | Inhalation      |               |
| Source Medium:                               |                          | Surface Soil    |               |
| Depth to Source (m):                         |                          | 0               |               |
| Rank                                         | Constituent              | Inhalation Risk |               |
|                                              |                          | HQmax           | CRmax         |
| 1                                            | <b>Benzene</b>           | 9.6E-2          | <b>2.7E-6</b> |
| 2                                            | Xylenes (mixed isomers)  | 4.0E-2          | -             |
| 3                                            | TPH - Aliphatic >C08-C10 | 1.0E-2          | -             |
| 4                                            | Naphthalene              | 8.3E-3          | -             |
| 5                                            | TPH - Aromatic >C10-C12  | 7.4E-3          | -             |
| 6                                            | TPH - Aromatic >C12-C16  | 2.5E-3          | -             |
| 7                                            | TPH - Aliphatic >C10-C12 | 2.4E-3          | -             |
| 8                                            | TPH - Aliphatic >C06-C08 | 1.6E-3          | -             |
| 9                                            | TPH - Aliphatic >C05-C06 | 1.3E-3          | -             |
| 10                                           | Toluene                  | 8.5E-4          | -             |
| 11                                           | Ethyl benzene            | 7.3E-4          | -             |
| 12                                           | TPH - Aliphatic >C12-C16 | 3.4E-4          | -             |
| 13                                           | Trimethylbenzene, 1,3,5- | 2.6E-4          | -             |
| 14                                           | n-Heptane                | 1.3E-4          | -             |

Notes:

- Table presents ranking of risk-driving fuel constituents by exposure pathway. Constituent risk rank based on maximum degree of exceedance of either of two criteria: i) HQmax > 1.0, or ii) CRmax > 1.0E-6.
- HQmax = Maximum estimated hazard quotient: Risks assume upper-end average concentration of each constituent in the fuel.
- CRmax = Maximum estimated cancer risk: Risks assume upper-end average concentration of each constituent in the fuel.
- Constituents listed in bold italics are identified on Table 9 as potentially risk-driving Constituents of Potential Concern (COPCs) for the corresponding pathway.

Table S.11 (page 2 of 6)

Relative Upper-Bound Risk Due to Exposure to Fuel Constituents: Kerosene / Jet Fuel

| Outdoor Inhalation - Vapors |                          |                 |               |
|-----------------------------|--------------------------|-----------------|---------------|
| Exposure Route:             |                          | Inhalation      |               |
| Source Medium:              |                          | Groundwater     |               |
| Depth to Source (m):        |                          | 3               |               |
| Rank                        | Constituent              | Inhalation Risk |               |
|                             |                          | HQmax           | CRmax         |
| 1                           | <b>Benzene</b>           | 4.7E-2          | <b>1.3E-6</b> |
| 2                           | Xylenes (mixed isomers)  | 4.3E-3          | -             |
| 3                           | TPH - Aliphatic >C08-C10 | 2.8E-3          | -             |
| 4                           | TPH - Aliphatic >C05-C06 | 1.1E-3          | -             |
| 5                           | TPH - Aliphatic >C06-C08 | 9.2E-4          | -             |
| 6                           | Naphthalene              | 6.4E-4          | -             |
| 7                           | TPH - Aromatic >C10-C12  | 5.8E-4          | -             |
| 8                           | TPH - Aliphatic >C10-C12 | 3.0E-4          | -             |
| 9                           | Toluene                  | 2.4E-4          | -             |
| 10                          | Ethyl benzene            | 1.5E-4          | -             |
| 11                          | TPH - Aromatic >C12-C16  | 1.4E-4          | -             |
| 12                          | n-Heptane                | 5.8E-5          | -             |
| 13                          | Trimethylbenzene, 1,3,5- | 2.9E-5          | -             |
| 14                          | TPH - Aliphatic >C12-C16 | 1.9E-5          | -             |

| Indoor Vapor Intrusion (Convection Driven) |                                    |                 |               |
|--------------------------------------------|------------------------------------|-----------------|---------------|
| Exposure Route:                            |                                    | Inhalation      |               |
| Source Medium:                             |                                    | Subsurface Soil |               |
| Depth to Source (m):                       |                                    | 0.15            |               |
| Note: Assumes no biodegradation            |                                    |                 |               |
| Rank                                       | Constituent                        | Inhalation Risk |               |
|                                            |                                    | HQmax           | CRmax         |
| 1                                          | <b>Benzene</b>                     | <b>2.2E+1</b>   | <b>6.3E-4</b> |
| 2                                          | <b>TPH - Aliphatic &gt;C08-C10</b> | <b>2.2E+0</b>   | -             |
| 3                                          | <b>Xylenes (mixed isomers)</b>     | <b>1.9E+0</b>   | -             |
| 4                                          | TPH - Aliphatic >C05-C06           | 8.9E-1          | -             |
| 5                                          | TPH - Aliphatic >C06-C08           | 7.2E-1          | -             |
| 6                                          | TPH - Aromatic >C10-C12            | 2.4E-1          | -             |
| 7                                          | TPH - Aliphatic >C10-C12           | 2.3E-1          | -             |
| 8                                          | Toluene                            | 1.3E-1          | -             |
| 9                                          | Naphthalene                        | 8.7E-2          | -             |
| 10                                         | Ethyl benzene                      | 8.1E-2          | -             |
| 11                                         | n-Heptane                          | 4.6E-2          | -             |
| 12                                         | TPH - Aromatic >C12-C16            | 3.5E-2          | -             |
| 13                                         | TPH - Aliphatic >C12-C16           | 1.5E-2          | -             |
| 14                                         | Trimethylbenzene, 1,3,5-           | 1.4E-2          | -             |

Notes:

1. Table presents ranking of risk-driving fuel constituents by exposure pathway.  
Constituent risk rank based on maximum degree of exceedance of either of two criteria: i) HQmax > 1.0, or ii) CRmax > 1.0E-6.
2. HQmax = Maximum estimated hazard quotient: Risks assume upper-end average concentration of each constituent in the fuel.
3. CRmax = Maximum estimated cancer risk: Risks assume upper-end average concentration of each constituent in the fuel.
4. Constituents listed in bold italics are identified on Table 9 as potentially risk-driving Constituents of Potential Concern (COPCs) for the corresponding pathway.

Table S.11 (page 3 of 6)

Relative Upper-Bound Risk Due to Exposure to Fuel Constituents: Kerosene / Jet Fuel

| Indoor Vapor Intrusion (Diffusion Driven) |                                    |                 |               |
|-------------------------------------------|------------------------------------|-----------------|---------------|
| Exposure Route:                           |                                    | Inhalation      |               |
| Source Medium:                            |                                    | Subsurface Soil |               |
| Depth to Source (m):                      |                                    | 0.15            |               |
| Note: Assumes no biodegradation           |                                    |                 |               |
| Rank                                      | Constituent                        | Inhalation Risk |               |
|                                           |                                    | HQmax           | CRmax         |
| 1                                         | <b>Benzene</b>                     | <b>1.9E+2</b>   | <b>5.4E-3</b> |
| 2                                         | <b>Xylenes (mixed isomers)</b>     | <b>1.9E+1</b>   | -             |
| 3                                         | <b>TPH - Aliphatic &gt;C08-C10</b> | <b>1.8E+1</b>   | -             |
| 4                                         | <b>TPH - Aliphatic &gt;C06-C08</b> | <b>5.8E+0</b>   | -             |
| 5                                         | <b>TPH - Aliphatic &gt;C05-C06</b> | <b>2.3E+0</b>   | -             |
| 6                                         | <b>TPH - Aromatic &gt;C10-C12</b>  | <b>1.9E+0</b>   | -             |
| 7                                         | <b>TPH - Aliphatic &gt;C10-C12</b> | <b>1.8E+0</b>   | -             |
| 8                                         | <b>Toluene</b>                     | <b>1.1E+0</b>   | -             |
| 9                                         | Naphthalene                        | 9.7E-1          | -             |
| 10                                        | Ethyl benzene                      | 7.8E-1          | -             |
| 11                                        | n-Heptane                          | 4.8E-1          | -             |
| 12                                        | TPH - Aromatic >C12-C16            | 2.8E-1          | -             |
| 13                                        | Trimethylbenzene, 1,3,5-           | 1.6E-1          | -             |
| 14                                        | TPH - Aliphatic >C12-C16           | 1.2E-1          | -             |

| Indoor Vapor Intrusion (Convection Driven) |                          |                 |               |
|--------------------------------------------|--------------------------|-----------------|---------------|
| Exposure Route:                            |                          | Inhalation      |               |
| Source Medium:                             |                          | Groundwater     |               |
| Depth to Source (m):                       |                          | 3               |               |
| Note: Assumes no biodegradation            |                          |                 |               |
| Rank                                       | Constituent              | Inhalation Risk |               |
|                                            |                          | HQmax           | CRmax         |
| 1                                          | <b>Benzene</b>           | <b>9.7E+0</b>   | <b>2.7E-4</b> |
| 2                                          | Xylenes (mixed isomers)  | 8.6E-1          | -             |
| 3                                          | TPH - Aliphatic >C08-C10 | 7.1E-1          | -             |
| 4                                          | TPH - Aliphatic >C05-C06 | 2.8E-1          | -             |
| 5                                          | TPH - Aliphatic >C06-C08 | 2.3E-1          | -             |
| 6                                          | TPH - Aromatic >C10-C12  | 1.1E-1          | -             |
| 7                                          | TPH - Aliphatic >C10-C12 | 7.3E-2          | -             |
| 8                                          | Naphthalene              | 6.4E-2          | -             |
| 9                                          | Toluene                  | 5.3E-2          | -             |
| 10                                         | Ethyl benzene            | 3.2E-2          | -             |
| 11                                         | TPH - Aromatic >C12-C16  | 2.1E-2          | -             |
| 12                                         | n-Heptane                | 1.4E-2          | -             |
| 13                                         | Trimethylbenzene, 1,3,5- | 6.1E-3          | -             |
| 14                                         | TPH - Aliphatic >C12-C16 | 4.7E-3          | -             |

Notes:

- Table presents ranking of risk-driving fuel constituents by exposure pathway. Constituent risk rank based on maximum degree of exceedance of either of two criteria: i) HQmax > 1.0, or ii) CRmax > 1.0E-6.
- HQmax = Maximum estimated hazard quotient: Risks assume upper-end average concentration of each constituent in the fuel.
- CRmax = Maximum estimated cancer risk: Risks assume upper-end average concentration of each constituent in the fuel.
- Constituents listed in bold italics are identified on Table 9 as potentially risk-driving Constituents of Potential Concern (COPCs) for the corresponding pathway.



Table S.11 (page 4 of 6)

Relative Upper-Bound Risk Due to Exposure to Fuel Constituents: Kerosene / Jet Fuel

| Indoor Vapor Intrusion (Diffusion Driven) |                          |                 |               |
|-------------------------------------------|--------------------------|-----------------|---------------|
| Exposure Route:                           |                          | Inhalation      |               |
| Source Medium:                            |                          | Groundwater     |               |
| Depth to Source (m):                      |                          | 3               |               |
| Note: Assumes no biodegradation           |                          |                 |               |
| Rank                                      | Constituent              | Inhalation Risk |               |
|                                           |                          | HQmax           | CRmax         |
| 1                                         | <b>Benzene</b>           | <b>8.2E+0</b>   | <b>5.4E-4</b> |
| 2                                         | Xylenes (mixed isomers)  | 7.5E-1          | -             |
| 3                                         | TPH - Aliphatic >C08-C10 | 5.0E-1          | -             |
| 4                                         | TPH - Aliphatic >C05-C06 | 2.0E-1          | -             |
| 5                                         | TPH - Aliphatic >C06-C08 | 1.6E-1          | -             |
| 6                                         | Naphthalene              | 1.1E-1          | -             |
| 7                                         | TPH - Aromatic >C10-C12  | 1.0E-1          | -             |
| 8                                         | TPH - Aliphatic >C10-C12 | 5.2E-2          | -             |
| 9                                         | Toluene                  | 4.3E-2          | -             |
| 10                                        | Ethyl benzene            | 2.6E-2          | -             |
| 11                                        | TPH - Aromatic >C12-C16  | 2.3E-2          | -             |
| 12                                        | n-Heptane                | 1.0E-2          | -             |
| 13                                        | Trimethylbenzene, 1,3,5- | 5.1E-3          | -             |
| 14                                        | TPH - Aliphatic >C12-C16 | 3.4E-3          | -             |

| Surface Soil Ingestion |                                    |                |               |
|------------------------|------------------------------------|----------------|---------------|
| Exposure Route:        |                                    | Ingestion      |               |
| Source Medium:         |                                    | Surface Soil   |               |
| Depth to Source (m):   |                                    | 0              |               |
| Rank                   | Constituent                        | Ingestion Risk |               |
|                        |                                    | HQmax          | CRmax         |
| 1                      | <b>Benzene</b>                     | <b>2.0E+0</b>  | <b>1.1E-5</b> |
| 2                      | <b>TPH - Aliphatic &gt;C10-C12</b> | <b>4.7E+0</b>  | -             |
| 3                      | <b>TPH - Aromatic &gt;C12-C16</b>  | <b>4.5E+0</b>  | -             |
| 4                      | <b>TPH - Aliphatic &gt;C08-C10</b> | <b>4.4E+0</b>  | -             |
| 5                      | <b>Methyl naphthalene, 2-</b>      | <b>4.3E+0</b>  | -             |
| 6                      | <b>TPH - Aliphatic &gt;C12-C16</b> | <b>3.9E+0</b>  | -             |
| 7                      | <b>TPH - Aromatic &gt;C10-C12</b>  | <b>2.3E+0</b>  | -             |
| 8                      | Toluene                            | 3.1E-1         | -             |
| 9                      | TPH - Aromatic >C16-C21            | 2.8E-1         | -             |
| 10                     | Naphthalene                        | 2.4E-1         | -             |
| 11                     | Xylenes (mixed isomers)            | 2.0E-1         | -             |
| 12                     | Methyl naphthalene, 1-             | 1.2E-1         | -             |
| 13                     | Ethyl benzene                      | 1.1E-1         | -             |
| 14                     | Trimethylbenzene, 1,3,5-           | 7.8E-2         | -             |
| 15                     | TPH - Aliphatic >C06-C08           | 5.0E-2         | -             |
| 16                     | TPH - Aliphatic >C16-C21           | 2.3E-2         | -             |
| 17                     | Phenanthrene                       | 2.3E-2         | -             |
| 18                     | TPH - Aliphatic >C05-C06           | 1.2E-2         | -             |
| 19                     | Acenaphthylene                     | 1.4E-3         | 6.5E-9        |
| 20                     | n-Heptane                          | 5.7E-3         | -             |
| 21                     | TPH - Aromatic >C21-C35            | 5.2E-3         | -             |
| 22                     | Fluorene                           | 1.6E-3         | -             |
| 23                     | Fluoranthene                       | 3.4E-4         | 1.2E-9        |
| 24                     | Acenaphthene                       | 1.2E-3         | 6.8E-10       |
| 25                     | Pyrene                             | 1.3E-4         | -             |
| 26                     | Anthracene                         | 6.3E-6         | -             |

Notes:

1. Table presents ranking of risk-driving fuel constituents by exposure pathway. Constituent risk rank based on maximum degree of exceedance of either of two criteria: i) HQmax > 1.0, or ii) CRmax > 1.0E-6.
2. HQmax = Maximum estimated hazard quotient: Risks assume upper-end average concentration of each constituent in the fuel.
3. CRmax = Maximum estimated cancer risk: Risks assume upper-end average concentration of each constituent in the fuel.
4. Constituents listed in bold italics are identified on Table 9 as potentially risk-driving Constituents of Potential Concern (COPCs) for the corresponding pathway.

Table S.11 (page 5 of 6)

Relative Upper-Bound Risk Due to Exposure to Fuel Constituents: Kerosene / Jet Fuel

| Surface Soil Dermal Contact |                                           |                      |                   |
|-----------------------------|-------------------------------------------|----------------------|-------------------|
| Exposure Route:             |                                           | Dermal Contact       |                   |
| Source Medium:              |                                           | Surface Soil         |                   |
| Depth to Source (m):        |                                           | 0                    |                   |
| Rank                        | Constituent                               | Dermal Contact Risk  |                   |
|                             |                                           | HQ <sub>max</sub>    | CR <sub>max</sub> |
| 1                           | <b><i>TPH - Aromatic &gt;C12-C16</i></b>  | <b><i>2.8E+0</i></b> | -                 |
| 2                           | <b><i>TPH - Aliphatic &gt;C12-C16</i></b> | <b><i>2.5E+0</i></b> | -                 |
| 3                           | Naphthalene                               | 2.0E-1               | -                 |
| 4                           | TPH - Aromatic >C16-C21                   | 1.8E-1               | -                 |
| 5                           | Xylenes (mixed isomers)                   | 3.7E-2               | -                 |
| 6                           | Acenaphthylene                            | 1.2E-3               | 2.9E-8            |
| 7                           | Phenanthrene                              | 1.9E-2               | -                 |
| 8                           | TPH - Aliphatic >C16-C21                  | 1.5E-2               | -                 |
| 9                           | Fluoranthene                              | 2.8E-4               | 5.5E-9            |
| 10                          | TPH - Aromatic >C21-C35                   | 3.3E-3               | -                 |
| 11                          | Acenaphthene                              | 1.0E-3               | 3.0E-9            |
| 12                          | Fluorene                                  | 1.3E-3               | -                 |
| 13                          | Pyrene                                    | 1.0E-4               | -                 |
| 14                          | Anthracene                                | 5.1E-6               | -                 |

| Combined Surface Soil Direct Contact |                                           |                                                                  |                      |
|--------------------------------------|-------------------------------------------|------------------------------------------------------------------|----------------------|
| Exposure Route:                      |                                           | Ingestion, Dermal Contact, Inhalation of Vapors and Particulates |                      |
| Source Medium:                       |                                           | Surface Soil                                                     |                      |
| Depth to Source (m):                 |                                           | 0                                                                |                      |
| Rank                                 | Constituent                               | Combined Direct Contact Risk                                     |                      |
|                                      |                                           | HQ <sub>max</sub>                                                | CR <sub>max</sub>    |
| 1                                    | <b><i>Benzene</i></b>                     | <b><i>2.1E+0</i></b>                                             | <b><i>1.3E-5</i></b> |
| 2                                    | <b><i>TPH - Aromatic &gt;C12-C16</i></b>  | <b><i>7.3E+0</i></b>                                             | -                    |
| 3                                    | <b><i>TPH - Aliphatic &gt;C12-C16</i></b> | <b><i>6.4E+0</i></b>                                             | -                    |
| 4                                    | <b><i>TPH - Aliphatic &gt;C10-C12</i></b> | <b><i>4.7E+0</i></b>                                             | -                    |
| 5                                    | <b><i>TPH - Aliphatic &gt;C08-C10</i></b> | <b><i>4.4E+0</i></b>                                             | -                    |
| 6                                    | <b><i>Methyl naphthalene, 2-</i></b>      | <b><i>4.3E+0</i></b>                                             | -                    |
| 7                                    | <b><i>TPH - Aromatic &gt;C10-C12</i></b>  | <b><i>2.3E+0</i></b>                                             | -                    |
| 8                                    | TPH - Aromatic >C16-C21                   | 4.6E-1                                                           | -                    |
| 9                                    | Naphthalene                               | 4.5E-1                                                           | -                    |
| 10                                   | Toluene                                   | 3.1E-1                                                           | -                    |
| 11                                   | Xylenes (mixed isomers)                   | 2.7E-1                                                           | -                    |
| 12                                   | Methyl naphthalene, 1-                    | 1.2E-1                                                           | -                    |
| 13                                   | Ethyl benzene                             | 1.1E-1                                                           | -                    |
| 14                                   | Trimethylbenzene, 1,3,5-                  | 7.8E-2                                                           | -                    |
| 15                                   | TPH - Aliphatic >C06-C08                  | 5.2E-2                                                           | -                    |
| 16                                   | Phenanthrene                              | 4.1E-2                                                           | -                    |
| 17                                   | TPH - Aliphatic >C16-C21                  | 3.8E-2                                                           | -                    |
| 18                                   | Acenaphthylene                            | 2.6E-3                                                           | 3.5E-8               |
| 19                                   | TPH - Aliphatic >C05-C06                  | 1.3E-2                                                           | -                    |
| 20                                   | TPH - Aromatic >C21-C35                   | 8.5E-3                                                           | -                    |
| 21                                   | Fluoranthene                              | 6.1E-4                                                           | 6.7E-9               |
| 22                                   | n-Heptane                                 | 5.8E-3                                                           | -                    |
| 23                                   | Acenaphthene                              | 2.2E-3                                                           | 3.7E-9               |
| 24                                   | Fluorene                                  | 3.0E-3                                                           | -                    |
| 25                                   | Pyrene                                    | 2.3E-4                                                           | -                    |
| 26                                   | Anthracene                                | 1.1E-5                                                           | -                    |

Notes:

- Table presents ranking of risk-driving fuel constituents by exposure pathway. Constituent risk rank based on maximum degree of exceedance of either of two criteria: i) HQ<sub>max</sub> > 1.0, or ii) CR<sub>max</sub> > 1.0E-6.
- HQ<sub>max</sub> = Maximum estimated hazard quotient: Risks assume upper-end average concentration of each constituent in the fuel.
- CR<sub>max</sub> = Maximum estimated cancer risk: Risks assume upper-end average concentration of each constituent in the fuel.
- Constituents listed in bold italics are identified on Table 9 as potentially risk-driving Constituents of Potential Concern (COPCs) for the corresponding pathway.

Table S.11 (page 6 of 6)

Relative Upper-Bound Risk Due to Exposure to Fuel Constituents: Kerosene / Jet Fuel

| Groundwater Ingestion |                                          |                      |                      |
|-----------------------|------------------------------------------|----------------------|----------------------|
| Exposure Route:       |                                          | Ingestion            |                      |
| Source Medium:        |                                          | Groundwater          |                      |
| Depth to Source (m):  |                                          | NA                   |                      |
| Rank                  | Constituent                              | Ingestion Risk       |                      |
|                       |                                          | HQ <sub>max</sub>    | CR <sub>max</sub>    |
| 1                     | <b><i>Benzene</i></b>                    | <b><i>3.0E+2</i></b> | <b><i>6.7E-3</i></b> |
| 2                     | <b><i>Toluene</i></b>                    | <b><i>1.2E+1</i></b> | -                    |
| 3                     | <b><i>Methyl naphthalene, 2-</i></b>     | <b><i>5.3E+0</i></b> | -                    |
| 4                     | <b><i>TPH - Aromatic &gt;C10-C12</i></b> | <b><i>3.1E+0</i></b> | -                    |
| 5                     | <b><i>Xylenes (mixed isomers)</i></b>    | <b><i>2.2E+0</i></b> | -                    |
| 6                     | <b><i>Ethyl benzene</i></b>              | <b><i>1.2E+0</i></b> | -                    |
| 7                     | <b><i>TPH - Aromatic &gt;C12-C16</i></b> | <b><i>1.2E+0</i></b> | -                    |
| 8                     | Naphthalene                              | 4.1E-1               | -                    |
| 9                     | Trimethylbenzene, 1,3,5-                 | 2.3E-1               | -                    |
| 10                    | Methyl naphthalene, 1-                   | 1.7E-1               | -                    |
| 11                    | TPH - Aliphatic >C08-C10                 | 1.0E-1               | -                    |
| 12                    | TPH - Aliphatic >C05-C06                 | 3.6E-2               | -                    |
| 13                    | TPH - Aliphatic >C06-C08                 | 1.9E-2               | -                    |
| 14                    | TPH - Aliphatic >C10-C12                 | 7.0E-3               | -                    |
| 15                    | TPH - Aromatic >C16-C21                  | 6.7E-3               | -                    |
| 16                    | Acenaphthylene                           | 2.5E-4               | 4.6E-9               |
| 17                    | n-Heptane                                | 1.1E-3               | -                    |
| 18                    | Phenanthrene                             | 7.2E-4               | -                    |
| 19                    | Acenaphthene                             | 2.3E-4               | 5.2E-10              |
| 20                    | Fluorene                                 | 1.4E-4               | -                    |
| 21                    | TPH - Aliphatic >C12-C16                 | 1.0E-4               | -                    |
| 22                    | Fluoranthene                             | 2.4E-6               | 3.5E-11              |
| 23                    | TPH - Aromatic >C21-C35                  | 1.0E-6               | -                    |
| 24                    | Pyrene                                   | 5.8E-7               | -                    |
| 25                    | Anthracene                               | 1.1E-8               | -                    |
| 26                    | TPH - Aliphatic >C16-C21                 | 1.5E-9               | -                    |

Notes:

- Table presents ranking of risk-driving fuel constituents by exposure pathway.  
Constituent risk rank based on maximum degree of exceedance of either of two criteria: i) HQ<sub>max</sub> > 1.0, or ii) CR<sub>max</sub> > 1.0E-6.
- HQ<sub>max</sub> = Maximum estimated hazard quotient: Risks assume upper-end average concentration of each constituent in the fuel.
- CR<sub>max</sub> = Maximum estimated cancer risk: Risks assume upper-end average concentration of each constituent in the fuel.
- Constituents listed in bold italics are identified on Table 9 as potentially risk-driving Constituents of Potential Concern (COPCs) for the corresponding pathway.
